## RESEARCH ARTICLE

# TGF- $\beta$ -driven downregulation of the transcription factor TCF7L2 affects Wnt/ $\beta$ -catenin signaling in PDGFR $\alpha^+$ fibroblasts

Oswaldo Contreras<sup>1,2,\*</sup>, Hesham Soliman<sup>2,3</sup>, Marine Theret<sup>2</sup>, Fabio M. V. Rossi<sup>2</sup> and Enrique Brandan<sup>1,5,†</sup>

## ABSTRACT

Mesenchymal stromal cells (MSCs) are multipotent progenitors essential for organogenesis, tissue homeostasis, regeneration and scar formation. Tissue injury upregulates transforming growth factor  $\beta$  (TGF- $\beta$ ) signaling, which modulates myofibroblast fate, extracellular matrix remodeling and fibrosis. However, the molecular determinants of MSC differentiation and survival remain poorly understood. During canonical Wnt signaling, T-cell factor/lymphoid enhancer factor (TCF/LEF) transcription factors regulate development and stemness, but the mechanisms by which injury-induced cues modulate their expression remain underexplored. Here, we studied the cell type-specific gene expression of TCF/LEF transcription factors and, more specifically, we investigated whether damage-induced TGF- $\beta$  signaling impairs the expression and function of TCF7L2 (also known as TCF4), using several models of MSCs, including skeletal muscle fibro-adipogenic progenitors. We show that TCF/LEFs are differentially expressed and that TGF- $\beta$  reduces the expression of TCF7L2 in MSCs but not in myoblasts. We also found that the ubiquitin–proteasome system regulates TCF7L2 proteostasis and participates in TGF- $\beta$ -mediated TCF7L2 protein downregulation. Finally, we show that TGF- $\beta$  requires histone deacetylase activity to repress the expression of TCF7L2. Thus, our work reports a novel interplay between TGF- $\beta$  and canonical Wnt signaling cascades in PDGFR $\alpha^+$  fibroblasts and suggests that this mechanism could be targeted in tissue repair and regeneration.

**KEY WORDS:** Myofibroblasts, Stem cells, Regeneration, MSCs, PDGFR $\alpha$ , Myoblasts

## INTRODUCTION

The remarkable long-term capacity of adult skeletal muscle to grow and regenerate is largely based on the presence of tissue-resident muscle stem cells (MuSCs, formerly called satellite cells) (Lepper et al., 2011; Murphy et al., 2011; Sambasivan et al., 2011). However, another tissue-resident population of quiescent

mesenchymal stromal cells (MSCs, also known as mesenchymal stem cells) is also essential for effective regeneration and maintenance of the skeletal muscle and its connective tissue (CT). Following acute damage, PDGFR $\alpha^+$  cells provide regenerative cues, regulate extracellular matrix (ECM) remodeling, and MuSC behavior, thus facilitating muscle regeneration and maintenance (Contreras, 2019d; Heredia et al., 2013; Joe et al., 2010; Scott et al., 2019; Uezumi et al., 2010; Wosczyzna et al., 2019). These stromal mesenchymal progenitors are also called fibro-adipogenic progenitors (FAPs) in mouse and human skeletal muscle (Agle et al., 2013; Dulauroy et al., 2012; Uezumi et al., 2014a; Vallecillo-García et al., 2017; Wosczyzna and Rando, 2018). Muscle FAPs have the potential to differentiate *in vivo* and *in vitro* into myofibroblasts, adipocytes, chondrogenic cells and osteogenic cells (Agle et al., 2013; Contreras et al., 2019c; Oishi et al., 2013; Uezumi et al., 2014b, 2010, 2011; Wosczyzna et al., 2012). PDGFR $\alpha^+$  mesenchymal progenitors are found in most mammalian tissues, where they regulate tissue homeostasis, repair and regeneration (Carr et al., 2019; Riquelme-Guzmán and Contreras, 2020; Lemos and Duffield, 2018; Lynch and Watt, 2018; Rognoni et al., 2018). Despite their required normal activity during muscle regeneration, we and others have suggested dysregulated behavior of these mesenchymal precursor cells in models of chronic muscle damage, muscular dystrophy (MD), neurodegenerative diseases and aging (Acuña et al., 2014; Contreras et al., 2016, 2019c; González et al., 2017; Ieronimakis et al., 2016; Kopinke et al., 2017; Madaro et al., 2018; Mahmoudi et al., 2019; Lemos et al., 2015; Lukjanenko et al., 2019; Uezumi et al., 2014a). Fibrosing disorders are a common outcome of the dysregulation of these fibroblastic cells and include non-malignant fibroproliferative diseases with high morbidity and mortality (Lemos and Duffield, 2018; Wynn and Ramalingam, 2012). However, the participation of mesenchymal progenitors in repair and regeneration remains poorly understood.

The Wnt signaling pathway has a key role in many aspects of developmental biology, tissue homeostasis, stem cell fate, organogenesis, cancer and tissue fibrogenesis. Secreted Wnt ligands, which are 19 secreted lipid-modified glycoproteins, bind to Frizzled receptors and the co-receptors LRP5 and LRP6 on the cell surface to initiate a signaling pathway that regulates the proteostasis of cytoplasmic  $\beta$ -catenin. In the absence of canonical Wnt ligands,  $\beta$ -catenin is a target for degradation mediated by the ubiquitin–proteasome system (UPS) (Aberle et al., 1997). Once the canonical cascade starts, the accumulation of  $\beta$ -catenin leads to its translocation to the nucleus, where it recognizes and binds the T-cell factor (TCF) or lymphoid enhancer factor (LEF) transcription factors (TFs), and recruits transcriptional partners and chromatin remodeling complexes, which in concert regulate the expression of TCF/LEF target genes. These TFs recognize TCF/LEF-binding sites in the regulatory elements of target genes to regulate the expression of thousands of genes (Cadigan and Waterman, 2012; Clevers, 2006; Schuijers et al., 2014). Therefore, the TCF/LEF TFs

<sup>1</sup>Departamento de Biología Celular y Molecular and Center for Aging and Regeneration (CARE-ChileUC), Facultad de Ciencias Biológicas, Pontificia Universidad Católica de Chile, 8331150 Santiago, Chile. <sup>2</sup>Biomedical Research Centre, Department of Medical Genetics and School of Biomedical Engineering, University of British Columbia, Vancouver, BC V6T 1Z3, Canada. <sup>3</sup>Faculty of Pharmacy, Minia University, 61519 Minia, Egypt.

\*Present address: Developmental and Stem Cell Biology Division, Victor Chang Cardiac Research Institute, Darlinghurst, NSW 2010, Australia. <sup>5</sup>Present address: Fundación Ciencia & Vida, 7780272 Santiago, Chile.

†Authors for correspondence (oicontr@uc.cl; o.contreras@victorchang.edu.au; ebrandan@bio.puc.cl)

© O.C., 0000-0002-8722-9371; M.T., 0000-0002-8059-8756; F.M.V.R., 0000-0002-0368-2620; E.B., 0000-0002-6820-5059

are the final effectors of the canonical Wnt/ $\beta$ -catenin signaling cascade in metazoans (Nusse and Clevers, 2017; Schuijers et al., 2014; Tang et al., 2008). Mammalian cells express four TCF/LEF protein-coding genes: TCF1 (also known as TCF7), LEF1, TCF7L1 (formerly named TCF3), and TCF7L2 (formerly named TCF4) (Cadigan and Waterman, 2012; Korinek et al., 1997; van de Wetering et al., 1991). They have critical roles regulating body plan establishment, cell fate specification, proliferation, survival and differentiation, which are predominant features in fast and constantly renewing tissues (Clevers, 2006; Korinek et al., 1998; Van De Wetering et al., 2002). Accumulating evidence indicates that pathologically activated canonical Wnt signaling plays a major role in the pathogenesis of fibrosis in multiple tissues (Chilosi et al., 2003; Cisternas et al., 2014; Colwell et al., 2006; Cosin-Roger et al., 2019; He et al., 2009, 2010; Henderson et al., 2010; Konigsho et al., 2008; Liu et al., 2009; Surendran et al., 2002; Trenszt et al., 2010; Wei et al., 2011). For example, the conditional genetic loss of  $\beta$ -catenin in cardiac fibroblast–myofibroblast lineages (TCF21<sup>+</sup> or periostin<sup>+</sup>) causes the reduction of interstitial fibrosis and attenuates heart hypertrophy induced by cardiac pressure overload (Xiang et al., 2017). Furthermore, upregulated Wnt activity during aging accounts, in part, for the declining regenerative potential of muscle with age and increased fibrosis (Brack et al., 2007). Studies of transgenic mice overexpressing canonical WNT10B demonstrated that activation of this pathway is sufficient to induce fibrosis *in vivo* (Akhmetshina et al., 2012). Mechanistically, it has been demonstrated that the Wnt/ $\beta$ -catenin pathway regulates the expression of several ECM genes in fibroblasts from different organs (Akhmetshina et al., 2012; Hamburg-Shields et al., 2015; Xiang et al., 2017). Altogether, these studies suggest that Wnt/ $\beta$ -catenin signaling in stromal cells is required for pathogenic ECM gene expression and collagen deposition during fibrogenesis.

Transforming growth factor beta (TGF- $\beta$ ) regulates the differentiation program of a variety of cell types (for review see David and Massagué, 2018; Derynck and Budi, 2019), including MSCs. Mechanistically, TGF- $\beta$  signaling stimulates proliferation of PDGFR $\alpha$ <sup>+</sup> cells, ECM production and myofibroblast differentiation (Contreras et al., 2019b; Lemos et al., 2015; Uezumi et al., 2011). Three TGF- $\beta$  isoforms – TGF- $\beta$ 1, TGF- $\beta$ 2, and TGF- $\beta$ 3 – are expressed in mammals (Massagué, 1998). These isoforms and their mediated signaling pathways are exacerbated in Duchenne muscular dystrophy (DMD) patients (Bernasconi et al., 1999; Smith and Barton, 2018), skeletal muscle of *mdx* mice (Gosselin et al., 2004; Lemos et al., 2015) and during fibrogenesis in several organs (Kim et al., 2018). Thus, it is recognized that dysregulated TGF- $\beta$  activity is a driver for reduced muscle regeneration, impaired tissue function and fibrosis (Juban et al., 2018; Mann et al., 2011; Pessina et al., 2015; Vidal et al., 2008). Interestingly, the inhibition of TGF- $\beta$  improves the pathophysiology of MD (Accornero et al., 2014; Acuña et al., 2014; Ceco and McNally, 2013; Cohn et al., 2007; Danna et al., 2014).

Here, we show that TCF/LEF members are differentially expressed in tissue-resident PDGFR $\alpha$ <sup>+</sup> cells and demonstrate that *Tcf7l2* is a novel TGF- $\beta$  target gene. The UPS participates in both the modulation of TCF7L2 proteostasis and TGF- $\beta$ -mediated downregulation of TCF7L2. We also found that TGF- $\beta$  requires the activity of histone deacetylases (HDACs) to repress *Tcf7l2* gene expression and to alter Wnt signaling. Finally, these effects were not observed in myogenic cells, suggesting that this crosstalk is specific to fibroblasts and MSCs.

## RESULTS

### Canonical Wnt TCF/LEF transcription factors are differentially expressed in PDGFR $\alpha$ <sup>+</sup> mesenchymal progenitor cells and fibroblasts

We first determined the relative expression of the Wnt TCF/LEF members in the MSC cell line C3H/10T1/2 and mouse embryonic fibroblasts (MEFs) (Fig. 1A). *Tcf7l1* and *Tcf7l2* were the two most highly expressed members of this family, whereas *Lef1* and *Tcf7* were almost not expressed in MSCs or MEFs (Fig. 1A). Then, we evaluated the expression of these transcription factors in *ex vivo* FACS-isolated skeletal muscle PDGFR $\alpha$ <sup>H2BEGFP+</sup> FAPs, which express the H2B–eGFP fusion gene from the *Pdgfra* locus (Fig. 1B; Fig. S1A). Our results using muscle PDGFR $\alpha$ <sup>+</sup> cells further corroborated the observations described above (Fig. 1C). We further corroborated these results using RNA-seq data of mononuclear muscle fractions (Scott et al., 2019). We focused on a Lin<sup>−</sup> (CD31<sup>−</sup>CD45<sup>−</sup>Ter119<sup>−</sup>) LY6A/Sca-1<sup>+</sup> population and observed that *Tcf7l2* and *Tcf7l1* transcripts were enriched in the Lin<sup>−</sup>Sca-1<sup>+</sup> fraction (Fig. 1D,E). Thus, these results suggest that among the Wnt TCF/LEF members *Tcf7l1* and *Tcf7l2*, but not *Lef1* or *Tcf7*, are highly expressed in PDGFR $\alpha$ <sup>+</sup> cells. We next evaluated TCF7L2 protein expression in skeletal muscle tissue and MSCs. The protein products detected by western blotting in most tissues and cells are ~78 and ~58 kDa in size (Tang et al., 2008; Weise et al., 2010). We found that these TCF7L2 protein isoforms are present in limb muscles and MSCs, representing the extended (E) and medium or short (M/S) isoforms (Fig. 1F; Fig. S1B) (Jin, 2016). We also found that the TCF7L2 TF is predominantly expressed in the nucleus of muscle-resident interstitial cells of the undamaged diaphragm muscle, isolated EGFP<sup>+</sup> FAPs from PDGFR $\alpha$ <sup>H2BEGFP</sup> mice and *mdx*;PDGFR $\alpha$ <sup>H2BEGFP</sup> dystrophic mice, and MEFs (Fig. 1G; Fig. S1B–E). The tissue-specific expression of the TCF/LEF members and their relative expression in MSCs was further corroborated by additional single-cell RNA-seq data (Fig. S1F,G) (The Tabula Muris Consortium et al., 2018). Next, we evaluated the expression of TCF7L2 in transiently activated PDGFR $\alpha$ <sup>+</sup> FAPs and confirmed that the TCF7L2 TF is present in these cells 3 d after notexin injury (Fig. 1H,I). Stromal PDGFR $\alpha$ <sup>+</sup> fibroblasts are also found in the heart, playing supportive roles in cardiac development and repair (Chong et al., 2011; Farbehi et al., 2019; Fu et al., 2018; Furtado et al., 2016; Soliman et al., 2020; Tallquist and Molkenin, 2017). Similar to what we found in MSC cell lines and muscle PDGFR $\alpha$ <sup>+</sup> FAPs, *Tcf7l1* and *Tcf7l2* were the two highest expressed members of this family in cardiac PDGFR $\alpha$ <sup>+</sup> fibroblasts, whereas *Lef1* and *Tcf7* have very low expression levels (Fig. 1J). We further corroborated these results using RNA-seq data from cardiac fibroblasts (Fu et al., 2018). We also found that *Tcf7l2* and *Tcf7l1* transcripts were enriched in the heart PDGFR $\alpha$ <sup>+</sup>-Tcf21<sup>+</sup> fibroblast population (Fig. 1K). Similar to muscle, both E and M/S TCF7L2 protein isoforms were also found in cardiac tissue and PDGFR $\alpha$ <sup>+</sup> fibroblasts (Fig. 1L,M). Altogether, these results establish that specific TCF/LEF transcription factors, namely TCF7L2 and TCF7L1, are highly expressed in PDGFR $\alpha$ <sup>+</sup> MSCs and fibroblasts as well as in total skeletal muscle and cardiac tissue.

### Dynamics of TCF7L2 expression in stromal fibroblasts during regeneration and repair

We, and other investigators, have previously demonstrated that subpopulations of stromal MSCs co-express both TCF7L2 and PDGFR $\alpha$  during skeletal muscle development and also in adulthood (Contreras et al., 2016, 2019a,b; Murphy et al., 2011; Vallecillo-García et al., 2017). As a consequence of the stromal

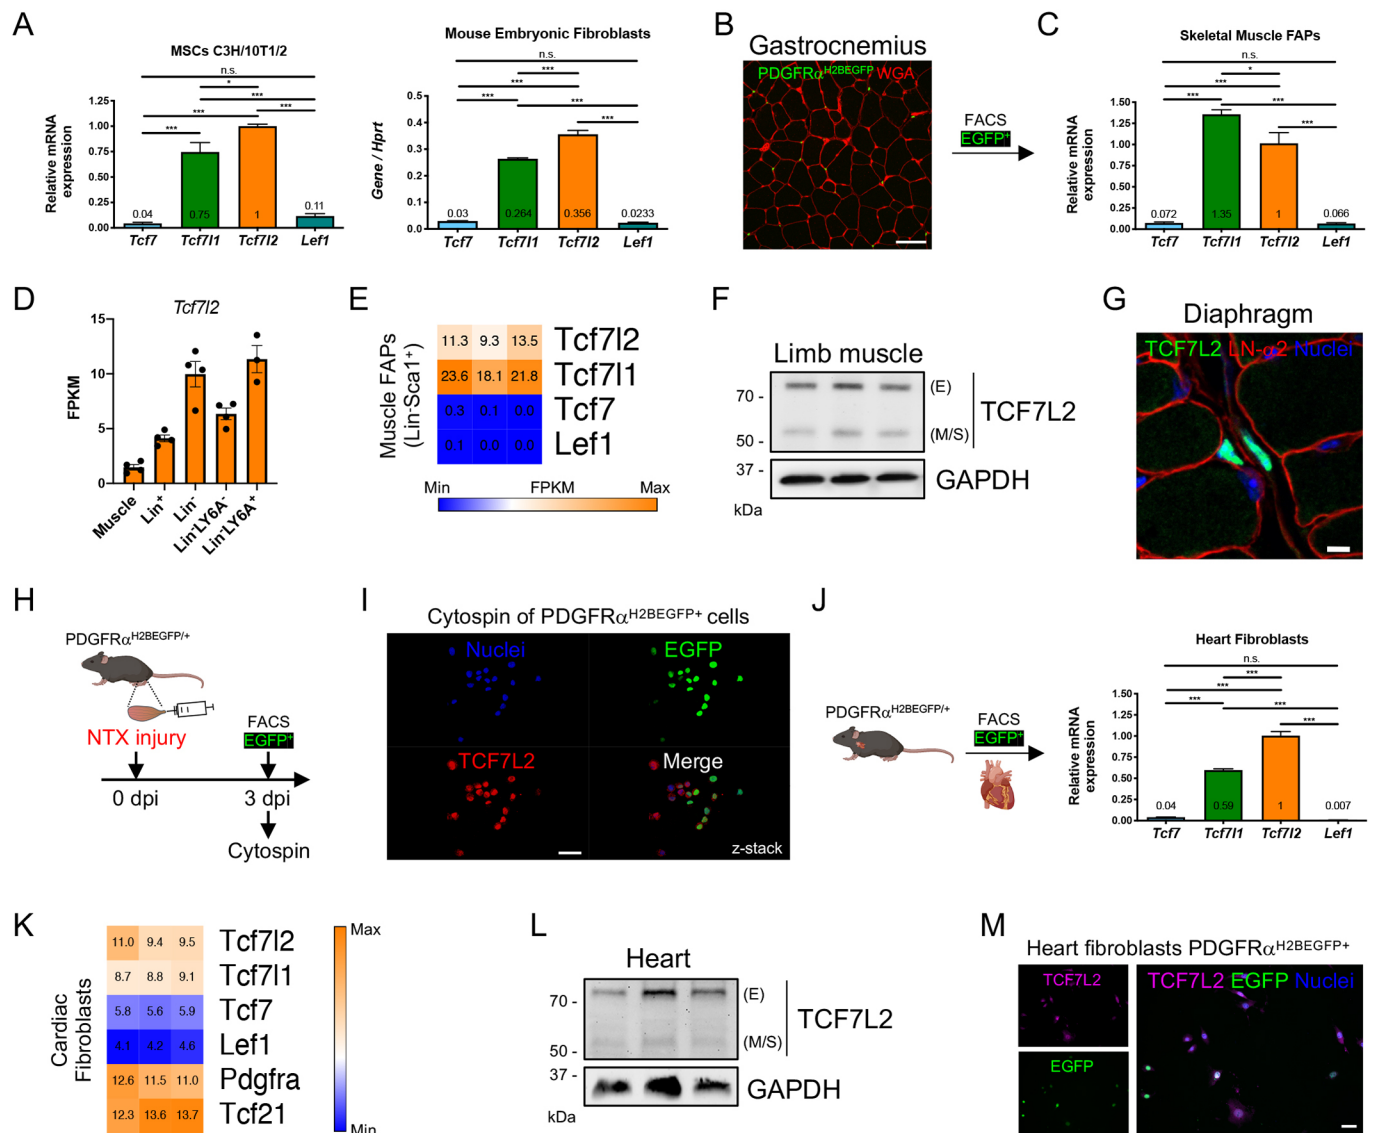

**Fig. 1. Differential expression of TCF/LEF transcription factors in mesenchymal progenitor cells and fibroblasts.** (A) *Tcf7*, *Tcf711*, *Tcf712*, and *Lef1* mRNA expression levels were analyzed by quantitative PCR in C3H/10T1/2 cells and MEFs in growing conditions.  $n=4$ . \*\*\* $P<0.001$ ; \* $P<0.05$ ; n.s., not significant (one-way ANOVA with Dunnett's post-test). (B) Skeletal muscle FAPs were FACS-isolated from PDGFR $\alpha$ <sup>H2BEGFP</sup> mice. WGA staining labels lectins of the ECM. Scale bar: 50  $\mu$ m. (C) *Tcf7*, *Tcf711*, *Tcf712*, and *Lef1* mRNA expression levels were analyzed by quantitative PCR in EGFP<sup>+</sup> FAPs in growing conditions.  $n=3$ . \*\*\* $P<0.001$ ; \* $P<0.05$ ; n.s., not significant (one-way ANOVA with Dunnett's post-test). (D) *Tcf712* transcript abundance (expressed as fragments per kilobase per million mapped reads, FPKM) in the different muscle cell fractions.  $n=3-4$ . (E) Heat map showing gene expression of TCF/LEF in muscle Lin<sup>-</sup>Sca1<sup>+</sup> population (FAPs). (F) Representative western blots showing TCF7L2 protein levels of the extended (E) and medium/short (M/S) isoforms in gastrocnemius muscle. GAPDH was used as the loading control. (G) Confocal image of TCF7L2 immunofluorescence. Laminin- $\alpha$ 2 (LN- $\alpha$ 2, red) and nuclei (Hoechst, blue) were also stained. Scale bar: 10  $\mu$ m. (H) Strategy used to isolate transit amplifying EGFP<sup>+</sup> FAPs at day 3 post notexin (NTX) TA injury. (I) z-stack confocal image of a cytopsin preparation of EGFP<sup>+</sup> FAPs showing TCF7L2 nuclear expression. Nuclear staining with Hoechst is shown in blue. Scale bar: 50  $\mu$ m. (J) *Tcf7*, *Tcf711*, *Tcf712* and *Lef1* mRNA expression levels were analyzed by quantitative PCR in cardiac fibroblasts in growing conditions.  $n=3$ . \*\*\* $P<0.001$ ; n.s., not significant (one-way ANOVA with Dunnett's post-test). (K) Heat map showing gene expression levels of TCF/LEF in cardiac fibroblasts. Known cardiac fibroblast marker genes (*Pdgfra* and *Tcf21*) are also shown. Each column represents an individual uninjured cardiac fibroblast ( $n=3$ ). (L) Representative western blots showing TCF7L2 protein levels in whole cardiac tissue. GAPDH was used as the loading control. (M) Immunofluorescence of TCF7L2 (magenta) in FACS-isolated heart PDGFR $\alpha$ <sup>H2BEGFP+</sup> cells in growing conditions. Nuclear staining with Hoechst is shown in blue. Scale bar: 50  $\mu$ m. Data in A,C,D and J are mean $\pm$ s.e.m.

expansion caused by injury, both TCF7L2 and PDGFR $\alpha$  protein levels are increased in dystrophic tissue, denervated muscle and after chronic barium chloride-induced damage (Contreras et al., 2016). Interestingly, the number of TCF7L2<sup>+</sup> cells and TCF7L2 bulk protein levels correlate with the extension of damage, fibrosis and TGF- $\beta$  levels in muscles of dystrophic *mdx* mice (Contreras et al., 2016, 2019a). Additionally, the expansion of TCF7L2<sup>+</sup> MSCs in human regenerating muscle closely associates with regenerating

myofibers *in vivo* (Mackey et al., 2017). Thus, to study whether the expression of TCF7L2 changes during regeneration and repair, we used two previously described muscle injury models (Uezumi et al., 2010; Kopinke et al., 2017). First, we aimed to study whole tissue TCF7L2 protein levels during skeletal muscle regeneration following glycerol-induced acute damage, a model that leads to transient expansion of PDGFR $\alpha$ <sup>+</sup> cells (Contreras et al., 2019c; Kopinke et al., 2017). As expected, glycerol acute damage caused

an increase in total TCF7L2 protein levels, which transiently peaked at day 3 following glycerol intramuscular injection (Fig. 2A,B). PDGFR $\alpha$  bulk protein levels increased with similar kinetics of expression as TCF7L2 after acute injury (Fig. 2A,B). We also found that  $\beta$ -catenin, the transcriptional partner of TCF7L2, increased after glycerol damage (Fig. 2A,B). Myosin heavy chain expression (specifically MyHC-2X, also known as MYH1), a marker of regenerating myofibers, peaked at day 7 after damage (Fig. 2A,B). As mentioned above, we previously described that the proportion of TCF7L2<sup>+</sup> stromal cells and TCF7L2 bulk expression increases in the dystrophic diaphragm, and we observed similar differences here (Fig. 2C,D) (Contreras et al., 2016). Intriguingly, at the single cell level we found a reduction in the expression levels of TCF7L2 in the expanded population of TCF7L2<sup>+</sup> cells in the dystrophic diaphragm, where the proportion of TCF7L2<sup>+</sup> cells expressing low levels of TCF7L2 was larger compared to levels in undamaged muscle. In the latter case, TCF7L2 expression was generally high (Fig. 2C). To further explore our observation, we used confocal microscopy and z-stack reconstructions of transverse muscle sections to analyze the cellular amount of TCF7L2 in TCF7L2<sup>+</sup> cells in the dystrophic diaphragm (Fig. 2C,E; Fig. S1H). Cells expressing high levels of TCF7L2 were distributed throughout the muscle interstitium, consistent with the findings of previous studies of fibroblast distribution (Fig. 2C; Fig. S1H) (Contreras et al., 2016, 2019c; Mathew et al., 2011; Merrell et al., 2015; Murphy et al., 2011). On the other hand, the number of cells expressing medium or low levels of TCF7L2 expanded, and their expansion corresponded to increased phosphorylation of SMAD3, an indicator of activated TGF- $\beta$  signaling in interstitial cells and muscle fibers, as well as in collagen type I-enriched areas (Fig. 2F–H; Fig. S1H). We further corroborated our results using RNA-seq data from undamaged PDGFR $\alpha$ <sup>+</sup> cardiac fibroblasts and after myocardial infarction (MI) (Fu et al., 2018). Genes encoding proteins involved in proliferation, TGF- $\beta$  signaling and modification of the ECM, as well as matrisome components were most highly induced at the initial stages (days 3 and 7) but then they were downregulated 2 and 4 weeks after MI (Fig. S2). However, we observed that the expression of *Tcf7l2* and *Tcf7l1* was highest in quiescent fibroblasts and became downregulated upon fibroblast activation, while expression of *Lef1* followed the opposite trend (Fig. S2). *Pdgfra* and *Tcf21* followed a similar kinetic pattern to that of *Tcf7l2* and *Tcf7l1*. Altogether, these results suggest that the magnitude of expansion of cells expressing medium and low levels of TCF7L2 depends on the extent of tissue inflammation, TGF- $\beta$  levels, damage and fibrosis, and hence they were abundant in the inflammatory dystrophic model and after MI.

### TGF- $\beta$ signaling downregulates the expression of TCF7L2 in PDGFR $\alpha$ <sup>+</sup> FAPs, MSCs and fibroblasts

Chronic upregulation of TGF- $\beta$  is found in several models of organ damage, where it is known to regulate the severity of tissue fibrosis. Activated extracellular TGF- $\beta$  not only promotes MSC survival and proliferation but also primes these progenitor cells to become myofibroblasts (Contreras et al., 2019b,c; Cho et al., 2018; Kim et al., 2018; Lemos et al., 2015). TCF7L2<sup>+</sup> cells expand near CD68<sup>+</sup> macrophages in dystrophic muscles (one of the major cell sources of TGF- $\beta$  in DMD) (Contreras et al., 2016; Juban et al., 2018; Tidball and Villalta, 2010). Our previous results suggest that the cell-specific expression of TCF7L2 negatively correlates with damage and inflammation in dystrophic muscle. Hence, damage-associated signaling pathways might regulate TCF7L2 expression and function endogenously during tissue repair. Therefore, we aimed to

investigate the role of TGF- $\beta$  signaling on the expression of TCF7L2 in fibroblast-related cell types and tissue-resident PDGFR $\alpha$ <sup>+</sup> cells. We first used the multipotent mesenchymal progenitor cell line C3H/10T1/2 as an *in vitro* model of MSCs, because these cells have been extensively used to study mesenchymal biology (Braun et al., 1989; Contreras et al., 2019c; Reznikoff et al., 1973; Riquelme-Guzmán et al., 2018; Singh et al., 2003). TGF- $\beta$ 1 treatment diminished TCF7L2 protein expression in C3H/10T1/2 MSCs in a concentration-dependent manner, with effects already noticeable at the pathophysiological concentration of 0.5 ng/ml (Fig. 3A,B; Fig. S3A,B). We observed that C3H/10T1/2 cells respond to TGF- $\beta$ 1, in a concentration-dependent manner, by increasing the expression of ECM-related proteins [fibronectin,  $\beta$ 1 integrin, CCN2 (also known as CTGF)] and  $\alpha$ SMA (ACTA2, a myofibroblast marker), as well as by reducing the expression of PDGFR $\alpha$  (Fig. 3A,B) (Contreras et al., 2019c). Moreover, TGF- $\beta$ 1-mediated reduction of TCF7L2 expression began 8 h after stimulation, reaching a maximum at 24 and 48 h. At this point the expression of TCF7L2 had decreased by ~85% (Fig. 3C,D). Similar effects were also seen in the embryonic fibroblast NIH-3T3 cell line (Fig. 3E,F; Fig. S3A,B). Taken together, these results suggest that TGF- $\beta$ 1 downregulates TCF7L2 protein expression in a concentration- and time-dependent manner in MSCs and fibroblasts. Consistently with the abovementioned results, we found that TGF- $\beta$ 1 treatment reduced the expression of TCF7L2 by ~50% in FACS-isolated muscle PDGFR $\alpha$ <sup>+</sup> FAPs (Fig. 3G,H). As expected, TGF- $\beta$ 1 treatment increased the expression of the ECM protein fibronectin (Fig. 3G) (Uezumi et al., 2010; Contreras et al., 2019c). Taken together, our results indicate that, concurrently with the induction of fibroblast activation and differentiation, TGF- $\beta$ 1 inhibits the expression of TCF7L2 in skeletal muscle PDGFR $\alpha$ <sup>+</sup> FAPs, and in two different mesenchymal cell lines, C3H/10T1/2 and NIH-3T3 fibroblasts.

Not only were TCF7L2 protein levels decreased in response to TGF- $\beta$ 1, but the relative levels of *Tcf7l2* mRNA were also diminished 2 h, 8 h and 24 h after TGF- $\beta$ 1 stimulation (Fig. 3I). *Tcf7l2* gene expression was also sensitive to the inhibition of mRNA synthesis with actinomycin D treatment, which suggests active *Tcf7l2* gene transcription and TCF7L2 translation in MSCs (Fig. 3J; Fig. S3C–E). The expression of PDGFR $\alpha$  was also very sensitive to the inhibition of mRNA synthesis with actinomycin D (Fig. 3J; Fig. S3C). Next, we evaluated whether TGF- $\beta$ 2 and TGF- $\beta$ 3 cytokines also impair TCF7L2 expression in MSCs. Similar to TGF- $\beta$ 1, both TGF- $\beta$ 2 and TGF- $\beta$ 3 strongly reduced TCF7L2 protein levels in MSCs (Fig. S3F,G). Thus, the three TGF- $\beta$  ligands decrease the expression of TCF7L2 in PDGFR $\alpha$ <sup>+</sup> cells. Next, to investigate whether the function of the Wnt-effector TF TCF7L2 was also altered by TGF- $\beta$ , we determined, by quantitative PCR, the gene expression levels of several validated TCF7L2 target genes in response to TGF- $\beta$ 1. We found that the expression of *Sox9*, *Axin2*, and *Tcf7l1* was repressed, while *Nfatc1*, *Lef1*, and *Tcf7* expression was increased in response to TGF- $\beta$ 1 (Fig. S3H). We did not find changes in *Cttnb1* (which encodes  $\beta$ -catenin) or *Cnd1* mRNA levels (Fig. S3H). Furthermore, RNA-seq analyses of TGF- $\beta$ -treated idiopathic pulmonary fibrosis (IPF) lung (Jones et al., 2019) and cardiac fibroblasts (Schafer et al., 2017) show that TGF- $\beta$ 1 alters the expression of several validated target genes of the Wnt/ $\beta$ -Catenin/TCF7L2 pathway. *Dkk1*, *Dkk3*, *Lrp5*, *Lef1*, *Tcf7l1*, *Tgfb2*, *Ctbp2*, *Sox9*, *Cxcl12* and *Nfatc4* expression is reduced, whereas expression of the *Fnl1*, *Colla1*, *Ctgf*, *Tgfb1*, *Foxo1*, *Wnt5a*, *Wnt5b*, *Wnt11*, *Wnt9a*, *Myc*, and *Oat* TCF7L2-target genes is increased after TGF- $\beta$ 1 treatment (Fig. 3K,L). Altogether, these data suggest that TGF- $\beta$

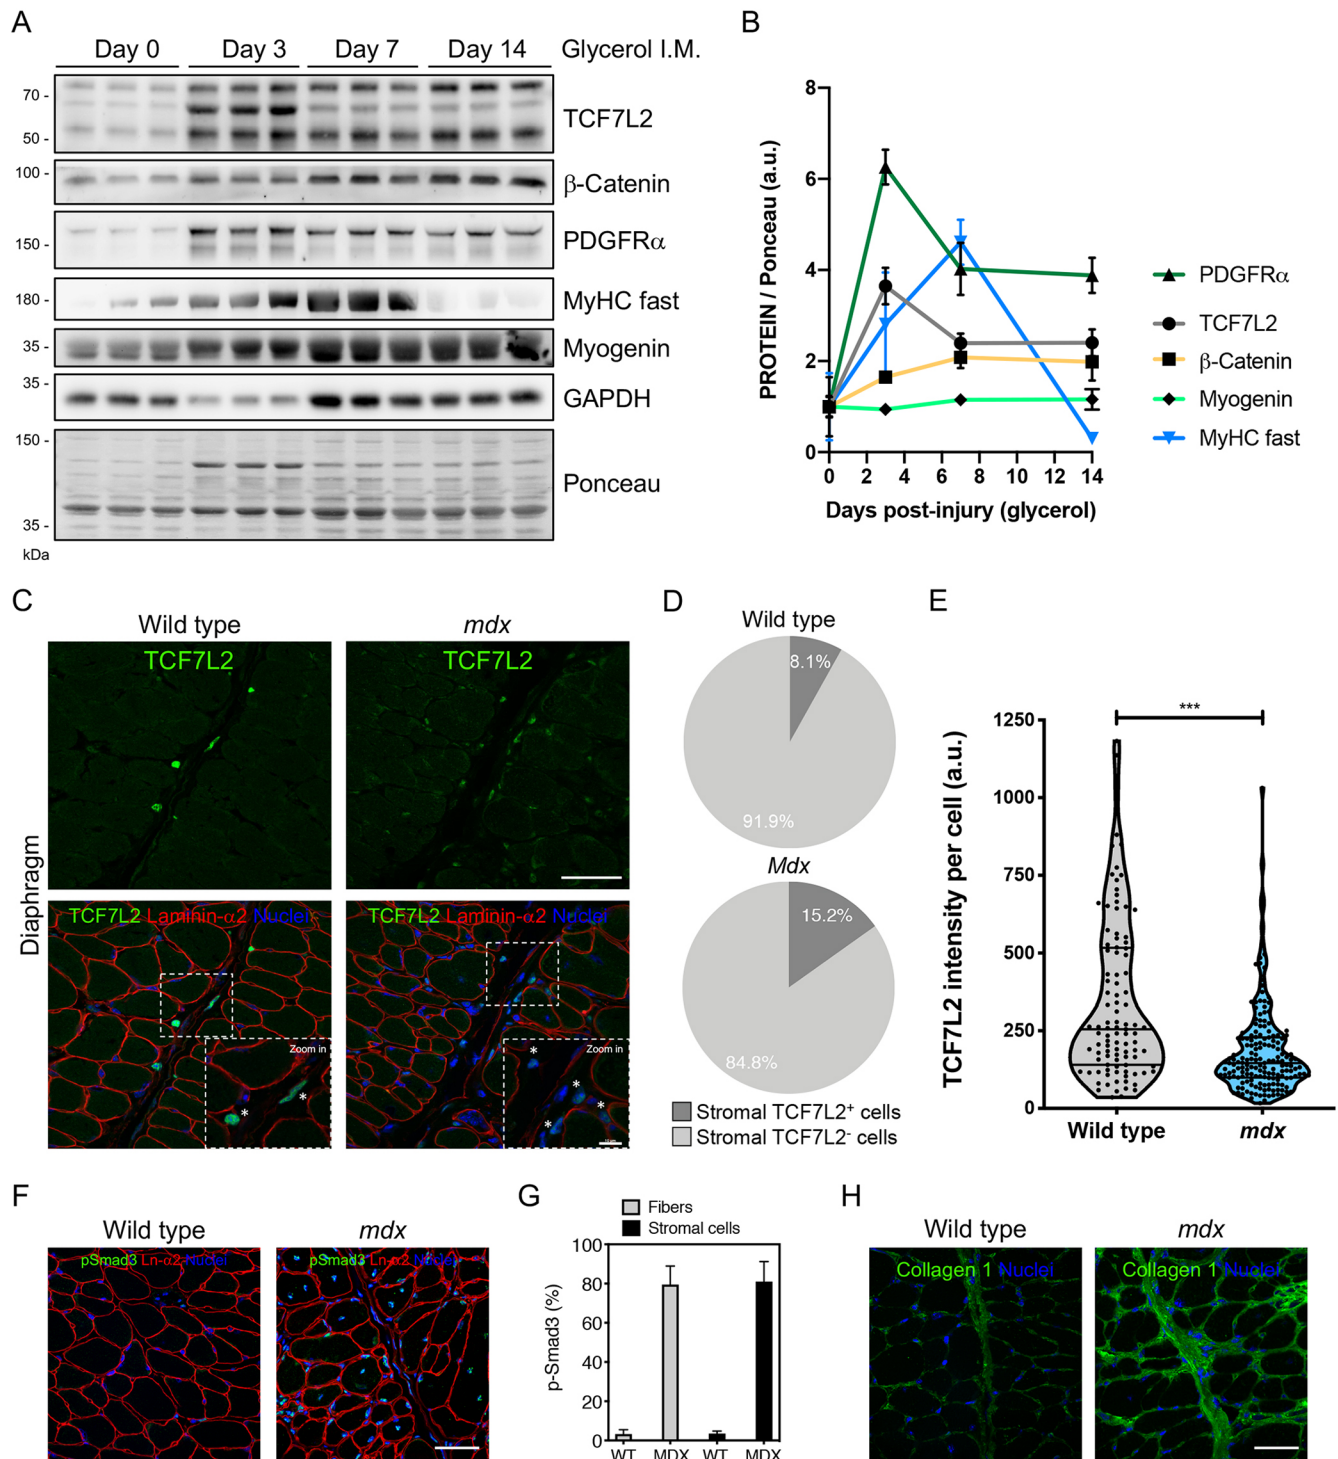

**Fig. 2. Dynamics of TCF7L2 expression in the stromal compartment during skeletal muscle regeneration and repair.** (A) Representative western blots showing TCF7L2,  $\beta$ -catenin, PDGFR $\alpha$ , MyHC fast (myosin heavy chain MyHC-2x), Myogenin and GAPDH in TA muscle after damage with glycerol at different time points (0, 3, 7 and 14 d). Ponceau red was used as the loading control. (B) Quantification of TCF7L2,  $\beta$ -catenin, PDGFR $\alpha$ , MyHC fast, and Myogenin protein expression.  $n=3$ . (C) z-stack confocal images showing the localization of TCF7L2<sup>+</sup> cells in diaphragm muscle sections of adult wild-type and *mdx* mice. Laminin- $\alpha$ 2 (red) and nuclei (Hoechst, blue) are also stained. Boxes indicate regions also shown as magnified images (zoom in). Asterisks indicate TCF7L2<sup>+</sup> cells in the magnified images. Scale bars: 50  $\mu$ m and 10  $\mu$ m. (D) Pie charts showing the increase in TCF7L2<sup>+</sup> cells in dystrophic diaphragms compared to wild-type diaphragms.  $n=4$ . (E) Quantification of fluorescence intensity of TCF7L2 in stromal TCF7L2<sup>+</sup> cells.  $n=4$ . \*\*\* $P<0.001$  (two-tailed Student's *t*-test). Horizontal bars indicate the first, second and third quartiles. (F) Representative confocal image showing the localization of phosphorylated-SMAD3<sup>+</sup> cells in diaphragm muscle sections of adult wild-type and *mdx* mice. Laminin- $\alpha$ 2 (LN- $\alpha$ 2, red) and nuclei (Hoechst, blue) are also stained. Scale bar: 50  $\mu$ m. (G) Quantification of the percentage of phospho-SMAD3<sup>+</sup> cells in fibers and stromal cells of wild-type (WT) and *mdx* mice.  $n=4$ . (H) Representative confocal image showing the increase of ECM collagen type 1 immunostaining in diaphragm of *mdx* compared to wild-type mice. Nuclei (Hoechst, blue) are also stained.  $n=3$ . Scale bar: 50  $\mu$ m. Data in B and G are mean $\pm$ s.e.m.

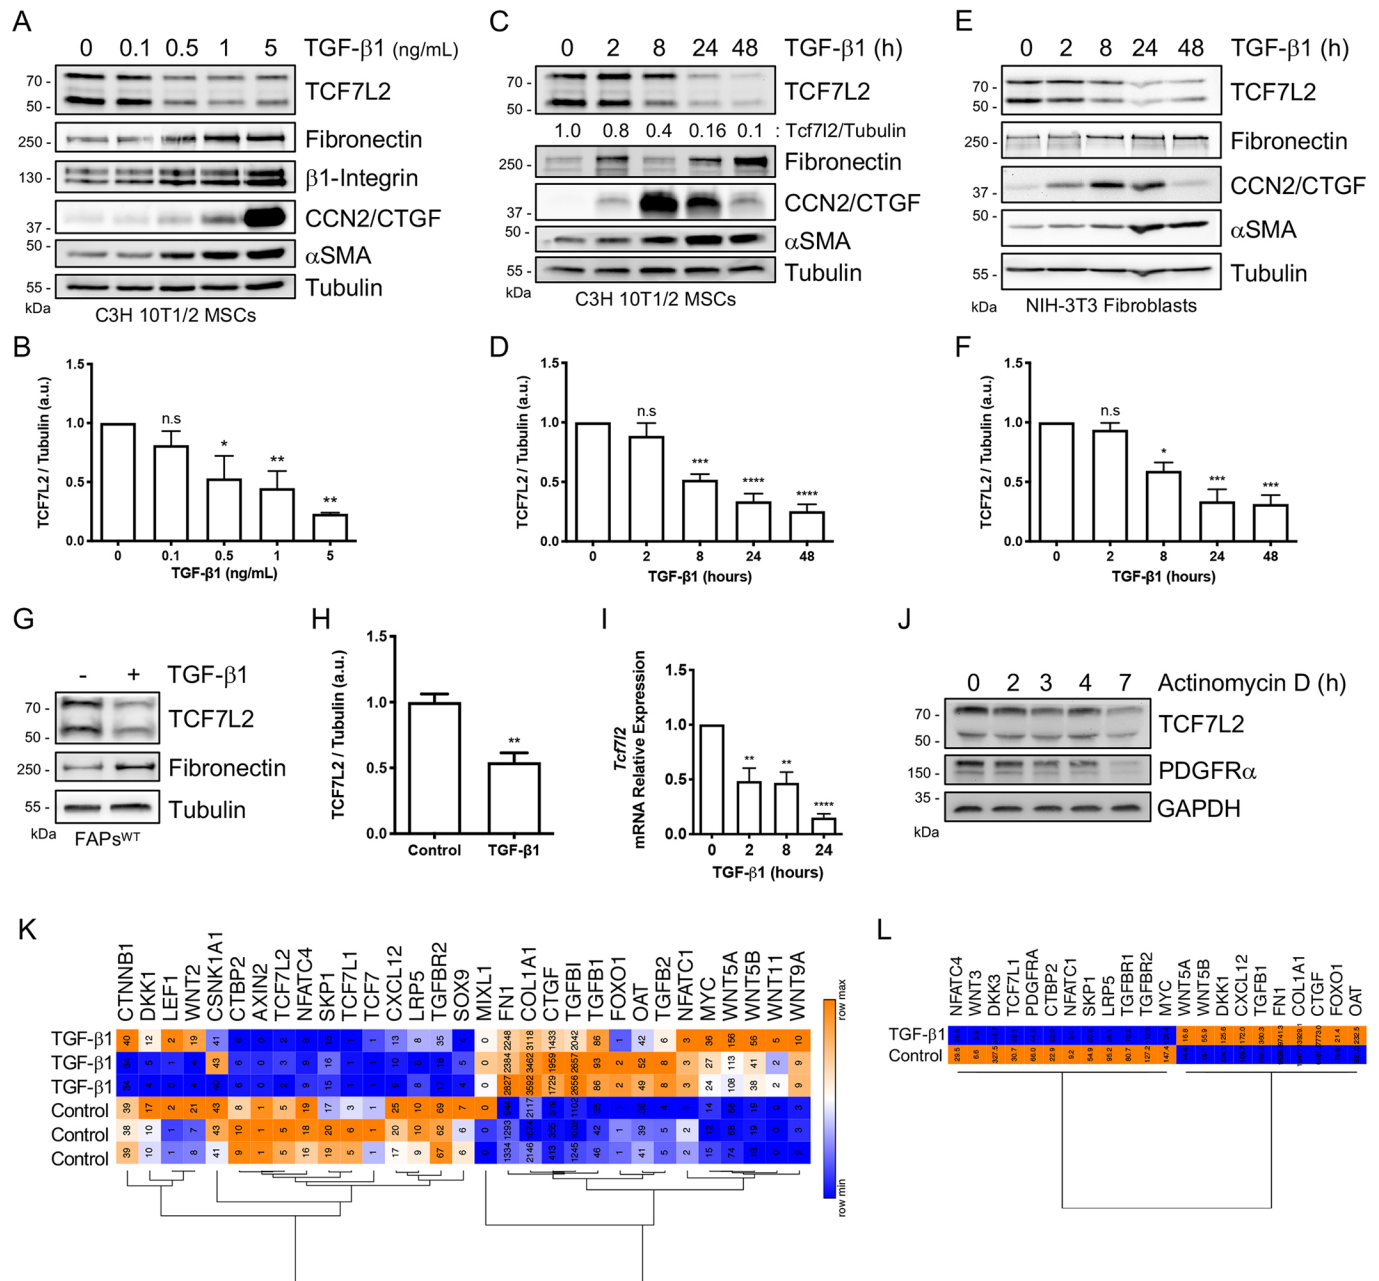

**Fig. 3. TGF- $\beta$  signaling downregulates the expression of the Wnt TF TCF7L2 in mesenchymal progenitors and fibroblasts.** (A) Representative western blots showing TCF7L2, fibronectin,  $\beta$ 1-integrin, CCN2 (CTGF), and  $\alpha$ SMA (ACTA2) expression levels in C3H/10T1/2 MSCs after treatment with different concentrations of TGF- $\beta$ 1 for 24 h. Tubulin was used as the loading control. (B) Quantification of TCF7L2 protein expression in the experiment described in A.  $n=4$ . \*\* $P < 0.005$ ; \* $P < 0.05$  (one-way ANOVA with Dunnett's post-test). (C,E) Representative western blots showing TCF7L2, fibronectin, CCN2 (CTGF), and  $\alpha$ SMA (ACTA2) expression levels in (C) C3H/10T1/2 MSCs and (E) NIH-3T3 fibroblasts after treatment with TGF- $\beta$ 1 (5 ng/ml) at different time points (0, 2, 8, 24, 48 h). Tubulin was used as the loading control. (D,F) Quantification of TCF7L2 protein expression in the experiments described in C and E, respectively.  $n=4$ . \*\*\*\* $P < 0.0001$ ; \*\*\* $P < 0.001$ ; \* $P < 0.05$ ; n.s., not significant (one-way ANOVA with Dunnett's post-test). (G) Representative western blots showing TCF7L2 and fibronectin expression levels after treatment with 5 ng/ml TGF- $\beta$ 1 (24 h) in PDGFR $\alpha$ -EGFP<sup>+</sup> FAPs. Tubulin was used as the loading control. (H) Quantification of TCF7L2 protein expression in the experiment described in G.  $n=3$ . \*\* $P < 0.005$  (two-tailed Student's *t*-test). (I) *Tcf7l2* mRNA expression levels were analyzed by quantitative PCR in C3H/10T1/2 MSCs after 2, 8 and 24 h of treatment with TGF- $\beta$ 1 (5 ng/ml).  $n=3$ . \*\*\*\* $P < 0.0001$ ; \*\*\* $P < 0.005$  (one-way ANOVA with Dunnett's post-test). (J) Representative western blots showing TCF7L2 and PDGFR $\alpha$  expression levels after treatment with actinomycin D for different time periods (0, 2, 3, 4, 7 h). GAPDH was used as the loading control. (K,L) Heat maps showing the expression changes of several validated TCF7L2-target genes that are repressed or induced by TGF- $\beta$  in lung fibroblasts (K) and cardiac fibroblasts (L). Data in B,D,F,H and I are mean  $\pm$  s.e.m.

signaling reduces the expression of TCF7L2, and therefore alters its TF function in PDGFR $\alpha$ <sup>+</sup> cells such as FAPs, MSCs and fibroblasts. Because TGF- $\beta$ -induced myofibroblast differentiation of MSCs correlates with reduced TCF7L2 expression and impaired function, we investigated the impact that *in vitro* differentiation towards other

lineages, such as adipocytes and osteocytes, might have on *Tcf7l2* expression. We used the expression of *Adipoq* and *Runx2* as markers of effective adipogenic and osteogenic commitment in MEFs (Fig. S4). Adipogenic differentiation did not alter *Tcf7l2* mRNA expression (Chen et al., 2018), whereas increased expression of

*Tcf7l2* was found after osteogenic differentiation (Fig. S4A). Interestingly, expression of *Tcf7l1*, *Lef1* and *Tcf7* also varied in response to adipogenic or osteogenic differentiation (Fig. S4A). These data suggest that different molecular mechanisms are involved in the regulation of *Tcf7l2* gene expression during differentiation to diverse cell lineages.

### Extracellular TGF- $\beta$ reduces the expression of TCF7L2 in a TGF- $\beta$ receptor type-1-dependent manner

Having detected a drop in the total levels of TCF7L2 TF, we next determined the extent of decrease of TCF7L2 protein levels in the

nuclei of TGF- $\beta$ -treated cells. A subcellular fractionation method (see Materials and Methods) allowed us to determine that TCF7L2 was relatively abundant in the nucleus, although TCF7L2 protein was also detected in the cytoplasm (Fig. S4B,C). TGF- $\beta$ 1 stimulation downregulated the expression of TCF7L2 in the nuclear and cytoplasmic fractions (Fig. 4A; Fig. S4B,C). Next, we studied further the association between TGF- $\beta$ -mediated fibroblast activation and reduced TCF7L2 levels. Using confocal microscopy, we confirmed that TCF7L2 nuclear expression was decreased in response to TGF- $\beta$ 1 and that TCF7L2 repression correlated with a TGF- $\beta$ -induced myofibroblast phenotype in FAPs and NIH-3T3

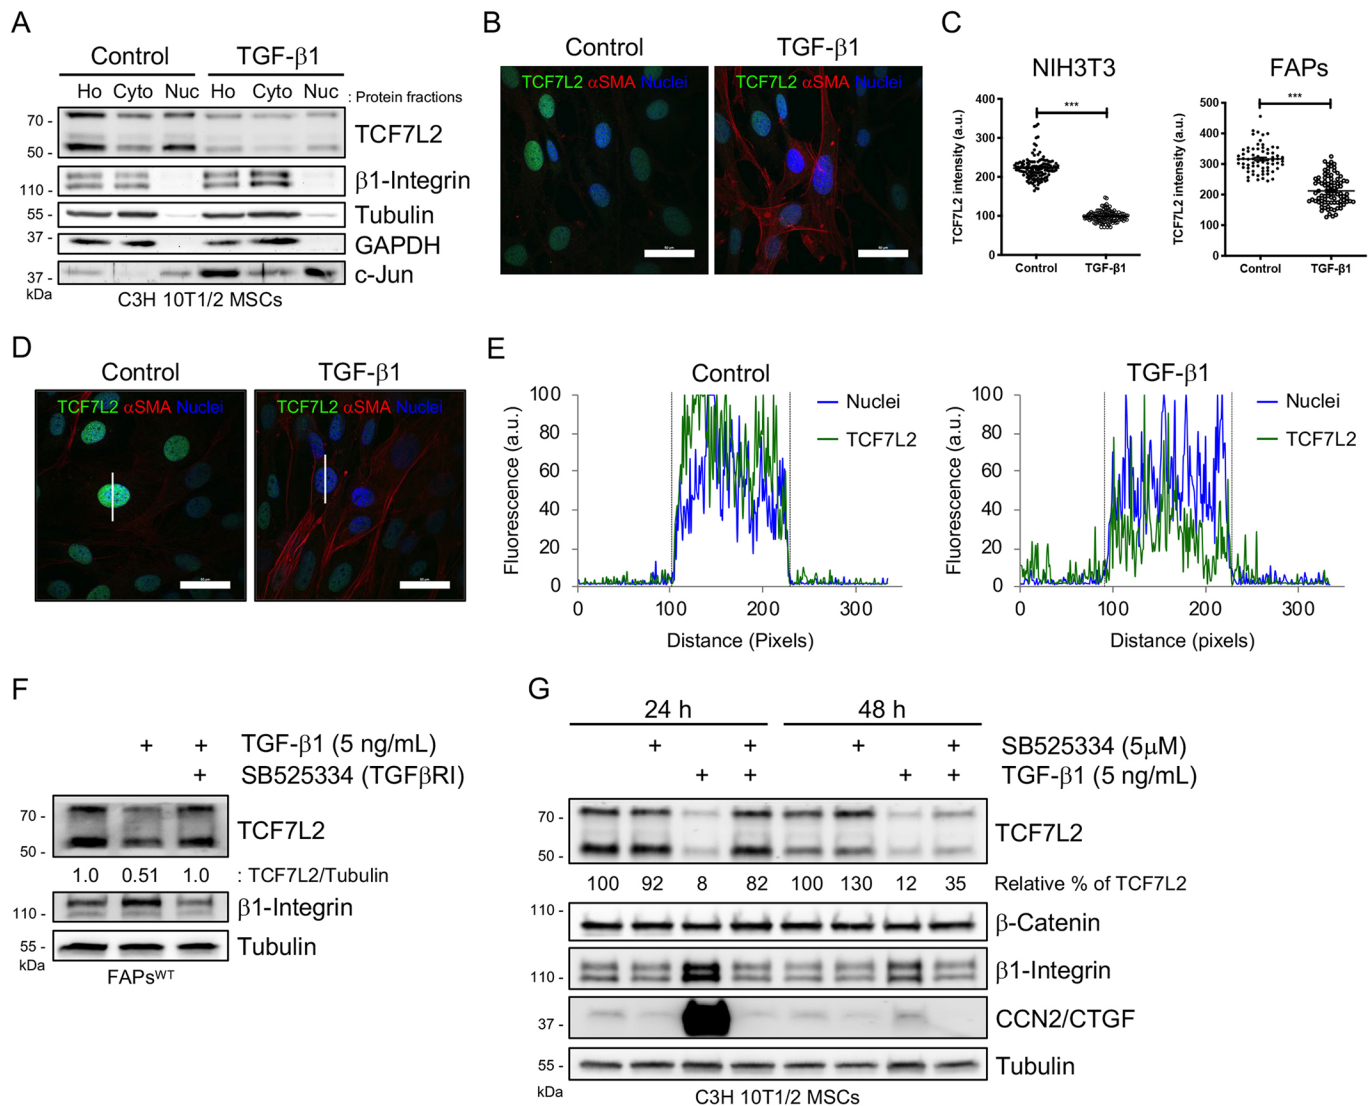

**Fig. 4. Extracellular TGF- $\beta$  reduces the expression of TCF7L2 TF through TGF $\beta$ R1 activation.** (A) Representative western blots showing TCF7L2,  $\beta$ 1-integrin, tubulin, GAPDH, and c-Jun expression levels in control and TGF- $\beta$ 1-treated C3H/10T1/2 cells. Ho, whole cell lysate; Cyto, cytoplasmic lysate; Nuc, nuclear lysate. (B) z-stack confocal images showing localization of TCF7L2 (green) and  $\alpha$ SMA (red) in control and TGF- $\beta$ 1-treated (36 h) C3H/10T1/2 MSCs. Nuclei (Hoechst, blue) are also stained. Scale bars: 50  $\mu$ m. (C) Quantification of the TCF7L2 fluorescence intensity in NIH-3T3 and EGFP<sup>+</sup> FAPs. (a.u., arbitrary units). Each dot represents a single cell quantified where a region of interest area was previously defined. Bars indicate mean  $\pm$  s.e.m. Data are pooled from  $n=3$  experiments. \*\*\* $P<0.001$  (two-tailed Student's  $t$ -test). (D) z-stack confocal images showing localization of TCF7L2 (green) and  $\alpha$ SMA (red) in control and TGF- $\beta$ 1-treated (24 h) C3H/10T1/2 MSCs. Nuclei (Hoechst, blue) are also stained. White lines indicate sections quantified in E. Scale bars: 50  $\mu$ m. (E) Label-distribution graphs showing the fluorescence intensity of TCF7L2 and Hoechst (Nuclei) along the cell axis as shown in D. Distance is shown in pixels; a.u., arbitrary units. Dotted lines show the nucleus–cytoplasm boundary. (F) Representative western blots showing TCF7L2 and  $\beta$ 1-integrin expression levels in wild-type PDGFR $\alpha$ <sup>+</sup> FAPs co-treated for 24 h with TGFBR1 inhibitor SB525334 (5  $\mu$ M) and TGF- $\beta$ 1 (5 ng/ml). Tubulin was used as the loading control and the ratio of TCF7L2 to tubulin signal is shown. (G) Representative western blots showing TCF7L2,  $\beta$ -catenin,  $\beta$ 1-integrin, and CCN2 (CTGF) expression levels in C3H/10T1/2 MSCs co-treated for 24 h or 48 h with the TGFBR1 (ALK-5) inhibitor SB525334 and TGF- $\beta$ 1. Tubulin was used as the loading control. Expression levels of TCF7L2 relative to tubulin expression are indicated as percentages.

fibroblasts (Fig. 4B,C; Fig. S4D). In addition, TGF- $\beta$  signaling did not alter the subcellular distribution of TCF7L2 protein (Fig. 4D,E). Overall, these data indicate that TGF- $\beta$ , in addition to inducing the differentiation of MSCs and fibroblasts into myofibroblasts, also represses the expression of the Wnt effector TCF7L2. Then, to investigate the role of TGF- $\beta$  receptors in the regulation of TCF7L2 by TGF- $\beta$ , we used the TGFBR1-specific small-molecule inhibitor SB525334 (Callahan et al., 2002). The binding of TGF- $\beta$  ligand to the type II receptor TGFBR2 leads to recruitment and phosphorylation of the type I receptor TGFBR1 (also known as ALK-5). Treatment with the TGFBR1 inhibitor completely abolished the downregulation of TCF7L2 expression by TGF- $\beta$ 1 in wild-type PDGFR $\alpha$ <sup>+</sup> FAPs and C3H/10T1/2 MSCs, without affecting the total levels of the TCF7L2-binding partner  $\beta$ -catenin (Fig. 4F,G). These results suggest that TGF- $\beta$ -mediated TCF7L2 downregulation requires the activation of TGF- $\beta$  receptors and the associated downstream signaling cascade.

### TGF- $\beta$ requires HDAC activity to repress *Tcf7l2* expression

The TGF- $\beta$  family acts via SMAD and non-SMAD signaling pathways to regulate several cellular responses (Derynck and Budi, 2019; Zhang, 2017). To investigate the role of SMAD and non-SMAD cascades in the regulation of TCF7L2 by TGF- $\beta$ , we used specific small-molecule inhibitors of SMAD3, p38 MAPKs, JNKs, and ERK1/2 (also known as MAPK3 and MAPK1, respectively) (Fig. 5A). None of these inhibitors were able to abolish the effect of TGF- $\beta$ 1 on the expression of TCF7L2 (Fig. 5A,B). Although we found in a previous study that p38 MAPK participates in TGF- $\beta$ -mediated downregulation of PDGFR $\alpha$  expression (Contreras et al., 2019c), we did not detect any significant effect of co-treatment with the p38 MAPK inhibitor SB203580 on TGF- $\beta$ -induced TCF7L2 downregulation (Fig. 5A,B; Fig. S5A). Interestingly, we found that co-treatment with SIS3, a SMAD3 inhibitor, augmented the inhibitory effect of TGF- $\beta$  on the expression of TCF7L2 (Fig. 5A,B; Fig. S5B). Overall, these results suggest that another, not yet identified, SMAD-independent pathway may participate in TGF- $\beta$ -mediated downregulation of TCF7L2 expression or that rather than SMAD3 activation, SMAD2/SMAD4 cofactors could be participating in TGF- $\beta$ -mediated TCF7L2 downregulation.

It has been suggested that TCF7L2 might be a non-histone target of HDACs. This was based on the observation that treatment with trichostatin A (TSA), a commonly used histone deacetylase inhibitor, reduces the protein expression of TCF7L2 by 50% in the human colon cancer cell type HCT116 (Götze et al., 2014). Since HDACs regulate transcription of many genes (Bolden et al., 2006; Greer et al., 2015; Seto and Yoshida, 2014), we first evaluated whether the TSA affects TCF7L2 protein levels in MSCs. Indeed, TSA treatment reduced TCF7L2 levels, although to a lesser extent than TGF- $\beta$  (Fig. 5C,D). Based on recent findings that demonstrated that TGF- $\beta$ -mediated fibroblast activation requires HDAC-mediated transcriptional repression (Jones et al., 2019), we examined whether inhibiting HDACs with TSA modified the TGF- $\beta$ -mediated reduction of TCF7L2 expression. Therefore, cells were treated with TGF- $\beta$ 1 and/or TSA for 8 h and then TCF7L2 protein levels were evaluated by western blotting. Interestingly, whereas TGF- $\beta$ 1 treatment decreased TCF7L2 expression, TSA treatment partially blocked TGF- $\beta$ -mediated repression of TCF7L2 expression (Fig. 5E,F). RNA-seq analysis from recent work on IPF lung fibroblasts helped us to corroborate our results (Fig. 5G) (Jones et al., 2019). The pan-HDAC inhibitor pracinostat attenuated the TGF- $\beta$ -mediated repression of *Tcf7l2* gene expression and induction of expression of genes encoding ECM-associated

proteins (Fig. 5G). Furthermore, TGF- $\beta$  also impairs TCF7L2-mediated target gene expression and Wnt signaling via HDACs (Fig. S6). Taken together, these data suggest that HDACs participate in the regulation of TGF- $\beta$ -mediated *Tcf7l2* repression.

### TGF- $\beta$ reduces TCF7L2 protein levels by stimulating its degradation via the UPS

To gain knowledge of the mechanisms involved in TGF- $\beta$ -induced TCF7L2 repression, we performed a timecourse analysis of treatment with the protein synthesis inhibitor cycloheximide. Thus, we determined that the half-life of TCF7L2 is quite short, being  $\sim$ 3.5 h in both proliferating C3H/10T1/2 MSCs and PDGFR $\alpha$ <sup>+</sup> FAPs ( $T_{1/2}$ =3.5 h) (Fig. 6A–C). Then, to study the molecular mechanism governing TGF- $\beta$ -mediated TCF7L2 downregulation, we evaluated the human TCF7L2 interactome using BioGRID datasets (Stark et al., 2006). Remarkably, several protein-quality-control-related proteins are interacting partners of TCF7L2, among them: RNF4, RNF43, RNF138, NLK, UHRF2, UBE2I, UBE2L6, USP4, UBR5 and XIAP (Fig. 6D). Because these TCF7L2 interacting proteins belong to or are related to the UPS, we performed *in silico* analyses and identified several top-ranked potential ubiquitination sites along the TCF7L2 protein sequence (Fig. 6E). Next, we used MG132, a potent proteasome inhibitor that reduces the degradation of ubiquitin-conjugated proteins (Nalepa et al., 2006), to evaluate the participation of the UPS in the downregulation of TCF7L2 induced by TGF- $\beta$ . Mechanistically, MG132 completely blocked TGF- $\beta$ -mediated downregulation of TCF7L2 protein after 9 h of co-treatment in MSCs and FAPs (Fig. 6F,G; Fig. S7A,B). MG132 also increased TCF7L2 basal protein levels when administered alone, which suggests that an intrinsic ubiquitin-mediated protein degradation mechanism controls TCF7L2 steady-state levels or proteostasis (Fig. 6F,G; Fig. S7). Remarkably, separation on a 12% SDS-PAGE gel allowed us to identify an unknown higher molecular weight form ( $\sim$ 65–70 kDa) of TCF7L2, which was not present at steady-state but was sensitive to proteasome-mediated proteolysis inhibition by MG132 (Fig. S7B). Finally, because our BioGRID analysis suggested the interaction of TCF7L2 with deubiquitinating enzymes (e.g. USP4), we evaluated the amount of TCF7L2 protein in C3H/10T1/2 MSCs treated with the ubiquitin-specific protease 7 (USP7) inhibitor HBX 41108 (HBX) in proliferating conditions (Colland et al., 2009; de la Vega et al., 2020; Yuan et al., 2018). Treatment with only HBX diminished TCF7L2 protein levels in a time-dependent manner (Fig. 6H). We also found that USP7-mediated TCF7L2 degradation was sensitive to the inhibition of protein synthesis (Fig. 6H). Taken together, these results suggest the participation of the UPS and ubiquitin-specific proteases in the regulation of TCF7L2 steady-state proteostasis and TGF- $\beta$ -mediated repression of TCF7L2 protein expression.

### TGF- $\beta$ does not affect the expression of TCF7L2 in C2C12 myoblasts

Myoblasts are known to respond to TGF- $\beta$  signaling (Droguett et al., 2006; Massagué et al., 1986; Riquelme et al., 2001; Riquelme-Guzmán et al., 2018; Schabort et al., 2009). Therefore, we investigated whether TCF7L2 downregulation by TGF- $\beta$  signaling was stromal cell-type-specific or whether it also occurred in myoblasts. C2C12 myoblasts express very low levels of TCF7L2 and  $\beta$ -catenin compared to C3H/10T1/2 MSCs (Fig. 7A,B; Fig. S8A,B). Similar to our findings using stromal cells, the TCF7L2 protein was expressed predominantly in the nuclei of myoblasts (Fig. S8A). However, TGF- $\beta$ 1 stimulation did not alter



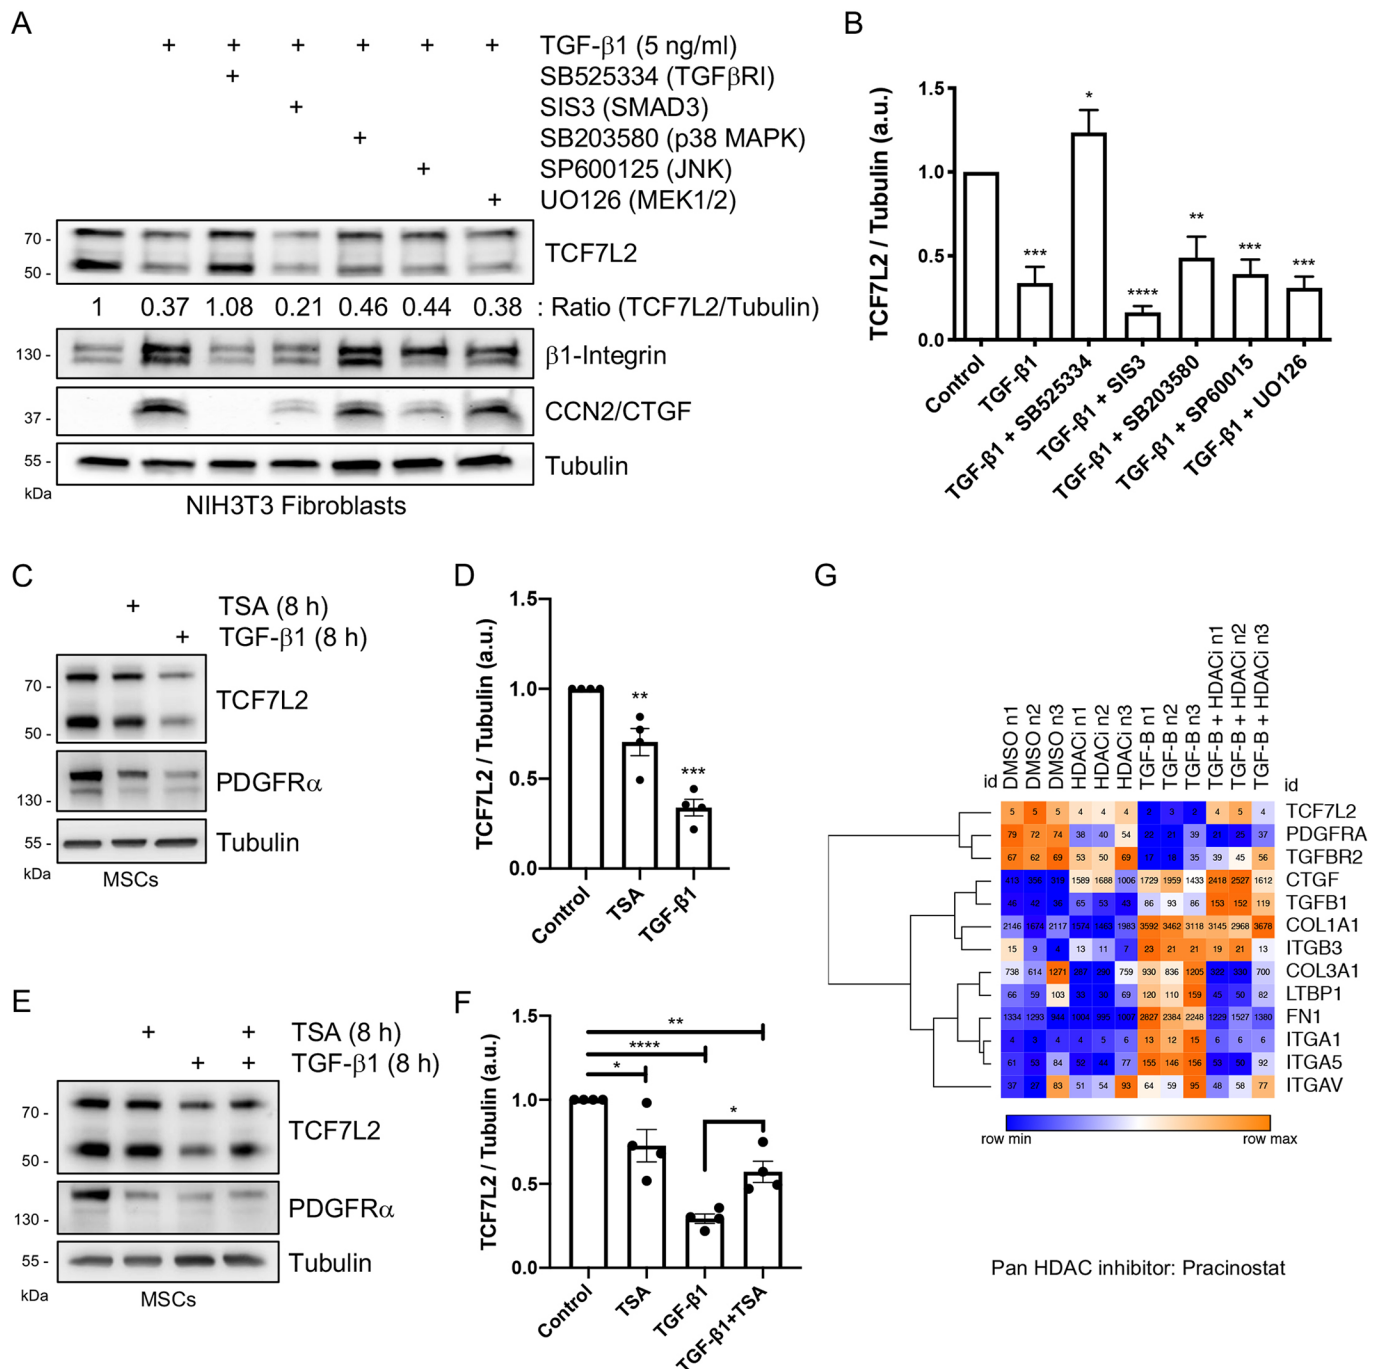

**Fig. 5. Histone deacetylases participate in TGF- $\beta$ -mediated repression of TCF7L2.** (A) Representative western blots showing TCF7L2,  $\beta$ 1-integrin, and CCN2 (CTGF) protein levels after TGF- $\beta$ 1 and SB525334, SIS3, SB203580, SP600125 and UO126 pharmacological co-treatments. Tubulin was used as the loading control and the ratio of TCF7L2 to tubulin signal is shown. (B) Quantification of TCF7L2 protein expression in the experiment described in A.  $n=5$ . \*\*\*\* $P<0.0001$ ; \*\*\* $P<0.001$ ; \*\* $P<0.005$ ; \* $P<0.05$  (one-way ANOVA with Dunnett's post-test). (C) Representative western blots showing TCF7L2 and PDGFR $\alpha$  protein levels after TGF- $\beta$ 1 (5 ng/ml) and trichostatin A (TSA; 10  $\mu$ M) treatments (8 h) of MSCs. Tubulin was used as the loading control. (D) Quantification of TCF7L2 protein expression in the experiment described in C.  $n=3$ . \*\*\*\* $P<0.001$ ; \*\* $P<0.005$  (one-way ANOVA with Dunnett's post-test). (E) Representative western blots showing TCF7L2 and PDGFR $\alpha$  protein levels after TGF- $\beta$ 1 and TSA co-treatments (8 h) in MSCs. Tubulin was used as the loading control. (F) Quantification of TCF7L2 protein expression in the experiment described in E.  $n=3$ . \*\*\*\* $P<0.0001$ ; \*\* $P<0.005$ ; \* $P<0.05$  (one-way ANOVA with Dunnett's post-test). (G) Heat map showing *Tcf7l2* expression (given as reads per kilobase per million mapped reads, RPKM) is substantially repressed by TGF- $\beta$  and reversed by the pan-HDAC inhibitor pracinostat (HDACi). Known ECM pro-fibrotic mediators [e.g. genes encoding collagens, CCN2 (CTGF), fibronectin and integrins] that are significantly increased by TGF $\beta$  and reversed by pracinostat are also shown. Each row is normalized to the within row variation. Each column, per treatment condition, represents an individual IPF lung fibroblast donor,  $n=3$ . Data in B, D and F are mean $\pm$ s.e.m.

the expression of TCF7L2, both at the protein and mRNA levels, in C2C12 myoblasts at the different concentrations used for 24 or 48 h (Fig. 7C–E; Fig. S8C,D). However, myoblasts did respond to TGF-

$\beta$  by increasing the expression of the two ECM components fibronectin and the matricellular protein CCN2 (Fig. 7C,E; Fig. S8C), as previously reported (Riquelme-Guzmán et al., 2018). Finally, we

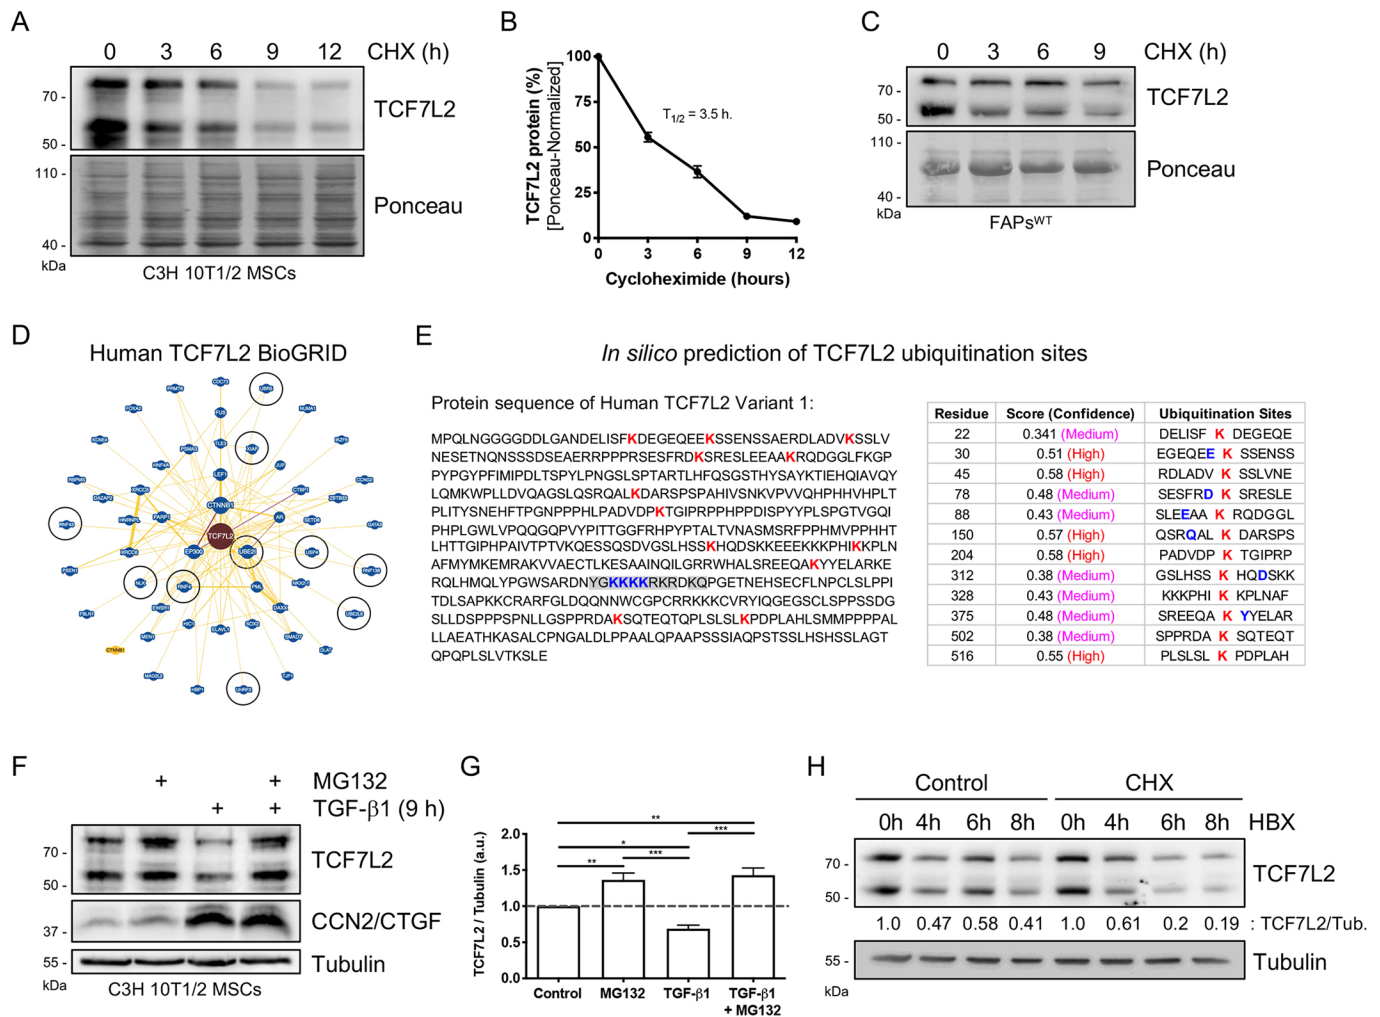

**Fig. 6. TGF- $\beta$  impairs TCF7L2 protein stability via the UPS.** (A) Representative western blots showing TCF7L2 protein levels after treatment with cycloheximide (CHX, 30  $\mu$ M) for different time periods (0, 3, 6, 9, 12 h) in C3H/10T1/2 cells. Ponceau was used as the loading control. (B) Quantification of three independent experiments showing TCF7L2 protein levels (as the mean  $\pm$  s.e.m. percentage of the 0 h level) after CHX treatment. (C) Representative western blots showing TCF7L2 protein levels after treatment with CHX for different time periods (0, 3, 6, 9 h) in wild-type muscle PDGFR $\alpha$ <sup>+</sup> FAPs. (D) BioGRID interactome analysis of the human TCF7L2 protein. Black circles mark the protein–protein interactions between TCF7L2 and RNF4, RNF43, RNF138, NLK, UHRF2, UBE21, UBE2L6, USP4, UBR5 and XIAP. (E) *In silico* prediction of TCF7L2 ubiquitination sites, showing the amino acid sequence of human TCF7L2 protein variant 1. Potential TCF7L2-ubiquitinated lysine residues were ranked and are shown in red. (F) Representative western blots showing TCF7L2 and CCN2 (CTGF) protein levels after TGF- $\beta$ 1 (1 ng/ml) and MG132 (15  $\mu$ M) treatments (9 h). Tubulin was used as the loading control. (G) Quantification of TCF7L2 protein levels in the experiment described in F.  $n=6$ . \*\*\* $P<0.001$ ; \*\* $P<0.005$ ; \* $P<0.05$  (one-way ANOVA with Dunnett's post-test). (H) Western blots representative of three independent experiments that evaluate total levels of TCF7L2 following USP7 small-molecule inhibitor HBX 41108 (10  $\mu$ M) and CHX treatments for different time periods (0, 4, 6, 8 h) in C3H/10T1/2 MSCs. Tubulin was used as the loading control and the ratio of TCF7L2 to tubulin signal is shown.

did not find changes in TCF7L2 subcellular distribution in myoblasts after TGF- $\beta$  treatment (Fig. 7F,G; Fig. S8E). Thus, although TGF- $\beta$  induces myoblast activation it does not change the expression of the TCF7L2 TF, which is expressed at relatively low levels in these cells compared to expression levels in PDGFR $\alpha$ <sup>+</sup> fibroblasts.

## DISCUSSION

In this study, first we reported differential gene expression of the four Wnt TCF/LEF TFs in PDGFR $\alpha$ <sup>+</sup> fibroblasts from skeletal muscle and cardiac tissue, MSC cell lines and MEFs. Second, we established that TCF7L2 is a novel TGF- $\beta$  target gene. Therefore, in addition to the strong reduction in gene and protein expression of TCF7L2 by TGF- $\beta$  signaling, the expression of several TCF7L2-target genes is also altered upon TGF- $\beta$  stimulation (Fig. 8). Third,

we showed, via analysis of the TCF7L2 BioGRID-based interaction network, *in silico* prediction of TCF7L2 ubiquitination residues and proteasome inhibition, that TGF- $\beta$  regulates TCF7L2 protein stability via the UPS (Fig. 8). We also found that two pan-HDAC inhibitors, TSA and pracinostat, counteracted TGF- $\beta$ -mediated repression of TCF7L2 (Fig. 8). Finally, we observed that TGF- $\beta$ -driven TCF7L2 downregulation is fibroblast-specific, as this effect did not occur in C2C12 myoblasts.

TCF/LEF TFs can act as activators or repressors of gene transcription, like other high-mobility group box-containing proteins, mostly depending on their binding cofactors, activators or repressors and in a tissue- and cell-specific fashion (Frieze et al., 2012; Jin, 2016; Lien and Fuchs, 2014; Tang et al., 2008; Weise et al., 2010). TCF7L2 emerges as an interesting TF to study because TCF7L2<sup>+</sup> MSCs are increased in number in fibrotic muscles from

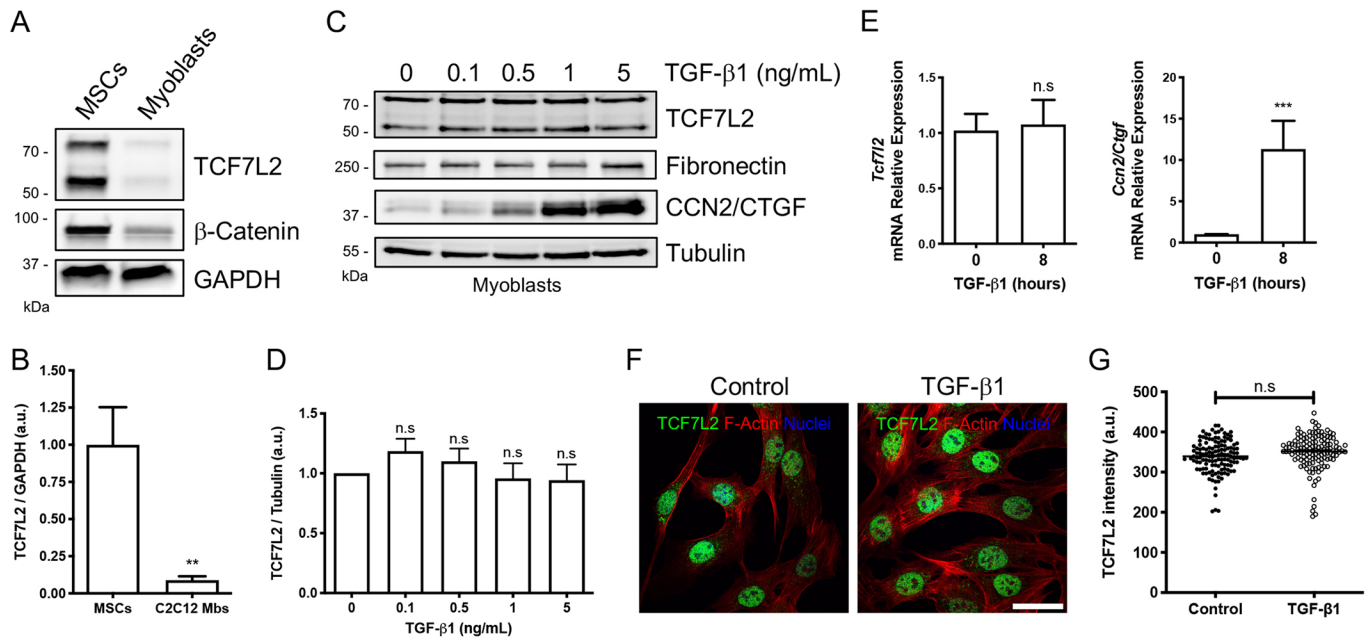

**Fig. 7. The expression of TCF7L2 remains unchanged in response to TGF- $\beta$  treatment in myoblasts.** (A) Western blots representative of three independent experiments, evaluating TCF7L2 and  $\beta$ -catenin protein levels in proliferating C3H/10T1/2 MSCs and C2C12 myoblasts. GAPDH was used as the loading control. (B) Quantification of TCF7L2 protein levels in the experiment described in A.  $n=3$ . \*\* $P<0.005$  (two-tailed Student's  $t$ -test). (C) Representative western blots showing TCF7L2, fibronectin, and CCN2 (CTGF) protein levels after treatment with different concentrations of TGF- $\beta$ 1 for 24 h. (D) Quantification of TCF7L2 protein levels in the experiment described in C.  $n=3$ . n.s., not significant (two-tailed Student's  $t$ -test). (E) *Tcf7l2* and *Ccn2* mRNA expression levels were analyzed by quantitative PCR in C2C12 myoblasts after 8 h of treatment with TGF- $\beta$ 1 (5 ng/ml).  $n=3$ . \*\*\* $P<0.001$ ; n.s., not significant (two-tailed Student's  $t$ -test). (F) Representative z-stack confocal images showing localization of TCF7L2 (green) and F-actin (red) in control and TGF- $\beta$ 1-treated (24 h) C2C12 myoblasts. Nuclei (Hoechst, blue) are also stained. Scale bar: 50  $\mu$ m. (G) Quantification of the TCF7L2 fluorescence intensity (a.u., arbitrary units) in C2C12 myoblasts. Each dot represents a single cell quantified where a region of interest area was previously defined. Data are pooled from  $n=3$  experiments. Horizontal bar indicates the mean. n.s., not significant (two-tailed Student's  $t$ -test). Data in B, D and E are mean $\pm$ s.e.m.

*mdx* mice and DMD (Contreras et al., 2016; Pessina et al., 2015), and also in damaged and atrophied muscles of the symptomatic amyotrophic lateral sclerosis (ALS) transgenic mice hSOD<sup>G93A</sup> (Gonzalez et al., 2017). TCF7L2<sup>+</sup> cells peak at day 5 following acute injury and then return to their basal levels once the damage is resolved (Murphy et al., 2011). In addition, TCF7L2 is a known transcriptional regulator in several cancers (Clevers, 2006; Cosin-Roger et al., 2019; Jin, 2016; Ravindranath et al., 2008; Tang et al., 2008; van de Wetering et al., 2002) and, to date, is the gene most closely associated with risk of type 2 diabetes (Grant et al., 2006; Jin, 2016). Nevertheless, most knowledge of canonical Wnt signaling concerns  $\beta$ -catenin translocation to the nucleus or dysregulated activity of upstream  $\beta$ -catenin-stability regulators like GSK-3 $\beta$  or CSNK1, but the precise contribution of TCF/LEF members to fibrogenesis has not yet been addressed. Even though TCF7L2 has been described as a marker for muscle CT fibroblasts (Contreras et al., 2016; Kardon et al., 2003; Mathew et al., 2011; Merrell et al., 2015), increasing evidence suggests that these cells share many properties with muscle PDGFR $\alpha$ <sup>+</sup> FAPs (Contreras et al., 2019b; Malecova et al., 2018; Wosczyzna and Rando, 2018).

A recent report demonstrated that TCF7L2 protein but not mRNA levels are increased during adipocyte differentiation, thereby TCF7L2 plays a regulatory role in fibroblast–adipocyte fate decisions *in vitro* and *in vivo* (Chen et al., 2018). In agreement with Chen et al. (2018) we did not find that *Tcf7l2* gene expression changes after adipogenic differentiation. However, the precise role of TCF7L2 in regulating the fate and lineage restriction of fibroblast still needs to be addressed. It is important to mention that our work may have some experimental limitations. For example, we have not

explored the role of different TCF/LEF TFs on the fate of MSCs. Here, we also reported that *Tcf7l1* (*Tcf3*) is a TCF/LEF gene with high expression in PDGFR $\alpha$ <sup>+</sup> cells. Regulation of the expression of *Tcf7l1* seems to resemble that of *Tcf7l2* but its role in fibroblast biology still needs to be further addressed. Interestingly, *Tcf7* and *Lef1* were expressed at very low levels under resting conditions, but they were strongly upregulated by tissue damage and TGF- $\beta$  treatment. This might be explained as a compensatory regulation of expression or as a TCF7L2-mediated response. *Tcf7* and *Lef1* are target genes of TCF7L2 (Frietze et al., 2012; Lien et al., 2014), which may explain why these two members are upregulated when TCF7L2 is downregulated by TGF- $\beta$ . However, future studies are needed to address the questions raised above.

The UPS has emerged as an essential component in cell and molecular biology due to its role in regulation of cellular proteostasis in homeostasis and disease (Nalepa et al., 2006; Yuan et al., 2018). Here, we demonstrated the participation of both the UPS and the deubiquitinase USP7 in the regulation of TCF7L2 steady-state levels and stability in response to TGF- $\beta$ . Although we did not address the ubiquitination status of TCF7L2, to our knowledge this is the first study suggesting potential cross-modulation between TGF- $\beta$  and the Wnt pathway through deubiquitinating enzymes and the UPS. Post-translational modifications of TCF7L2 occur in the forms of phosphorylation (Ishitani et al., 2003), acetylation (Elfert et al., 2013) and SUMOylation (Yamamoto et al., 2003). Although recent reports demonstrated the ubiquitination of some TCF/LEF members (Han et al., 2017; Song et al., 2018; Yamada et al., 2006), the extent and importance of ubiquitin-mediated regulatory mechanisms for

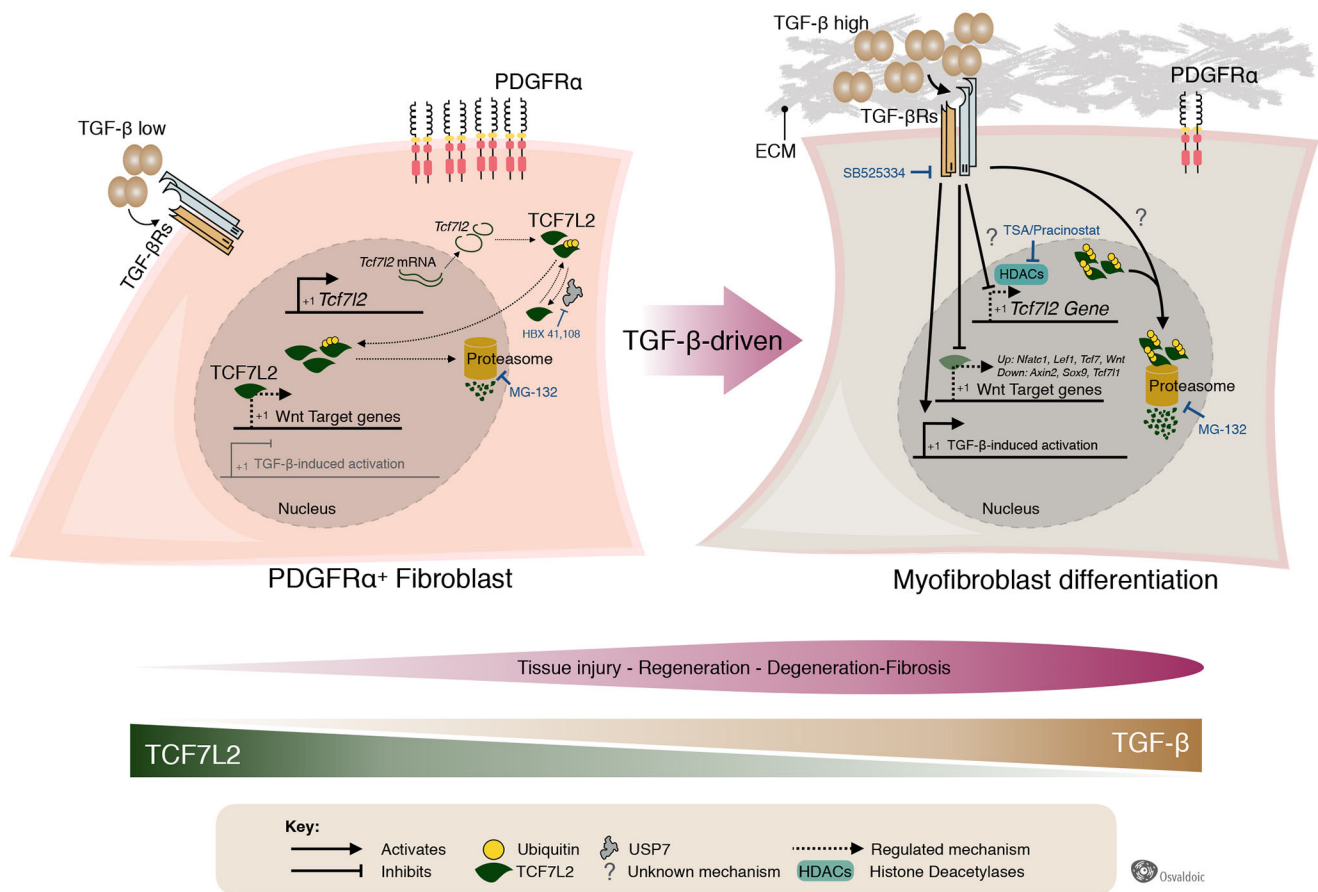

**Fig. 8. Model of TGF- $\beta$ -driven fibroblast–myofibroblast differentiation and the Wnt/TCF7L2 regulatory network.** MSCs and fibroblasts express high levels of TCF7L2 in the resting quiescent state, but they lose this TF post-activation with TGF- $\beta$ . *Tcf7l2* gene expression is active in unstimulated cells, leading to continuous production of the TCF7L2 protein. TCF7L2 localizes mainly in the cell nucleus where it recognizes its target genes to activate or repress their expression, depending on the cell context and its transcriptional partners. The UPS constantly regulates the proteostasis of TCF7L2. Following muscle damage, TGF- $\beta$  ligands released from macrophages (paracrine) and FAPs (autocrine) bind to TGF- $\beta$  receptors (TGF- $\beta$ Rs). This event activates TGFBR-dependent signaling cascades that downregulate TCF7L2 expression and impair TCF7L2-dependent gene expression and Wnt/ $\beta$ -catenin gene signature. Mechanistically, inhibition of 26S proteasome activity with MG132 blocks TGF- $\beta$ -mediated TCF7L2 protein degradation. Also, pan-HDAC inhibitors (TSA and pracinostat) attenuate TGF- $\beta$ -mediated repression of TCF7L2 expression and ECM gene activation.

activity of these TFs are still elusive. TCF7L1 half-life was reported to be longer than 12 h, with the DNA-binding of TCF7L1 regulating its protein stability, and therefore, Wnt signaling (Shy et al., 2013). Because TGF- $\beta$  signaling is a known chromatin-modifying factor (Massagué, 2012), an intriguing possibility is that TCF7L2 DNA-binding regulates its stability and that TGF- $\beta$ -induced chromatin remodeling might negatively affect TCF7L2 stability. However, the complexity of different molecular events maintaining TCF7L2 protein or mRNA levels in PDGFR $\alpha^+$  cells remains unclear. A limitation of this study is that we did not investigate the role of TCF7L2 in TGF- $\beta$ -mediated ECM remodeling and myofibroblast differentiation. Because TCF7L2 is known to regulate the expression of thousands of genes in a cell-type-specific manner (Friezze et al., 2012; Schuijers et al., 2014; Tang et al., 2008; Weise et al., 2010), we propose that TGF- $\beta$ -induced TCF7L2 downregulation should have a massive and profound impact on the transcriptome of fibroblasts.

Recently, histone deacetylase inhibitors (HDACi) have emerged as potential compounds for use in pre-clinical and clinical studies to improve tissue regeneration and repair in DMD (Bettica et al., 2016; Minetti et al., 2006). Central to this idea is that PDGFR $\alpha^+$  cells are specifically targeted by HDACi in muscular dystrophies (Mozzetta et al., 2013; Saccone et al., 2014). HDACi reduce DMD progression

by increasing muscle regeneration while inhibiting fibro-fatty differentiation of PDGFR $\alpha^+$  cells. Mechanistically, HDACi favor intercellular communication between PDGFR $\alpha^+$  FAPs and myogenic progenitors during regeneration and repair (Bettica et al., 2016; Mozzetta et al., 2013; Saccone et al., 2014). Here, we observed that two well-characterized, known pan-HDACi reduce TGF- $\beta$ -mediated ECM gene expression and also block TGF- $\beta$ -induced downregulation of *Tcf7l2* expression. This corresponds with our results showing that HDACi modulate TGF- $\beta$ -mediated changes in expression of Wnt/TCF7L2 downstream genes. Further studies should unravel the mechanism by which HDACi regulate the Wnt/TCF7L2-dependent gene network.

Canonical Wnt signaling activation through WNT1 upregulates collagen deposition in the ECM and promotes fibroblast differentiation into myofibroblasts (Akhmetshina et al., 2012). Similarly, TGF- $\beta$  activates the canonical Wnt cascade by inducing nuclear accumulation of  $\beta$ -catenin and increasing the activity of TCF/LEF-responsive elements in reporter assays. Therefore, TGF- $\beta$  mediates reduction in expression of the Wnt inhibitor DKK1 (Akhmetshina et al., 2012). This seems to be in agreement with our results showing that TGF- $\beta$  reduces the expression of several TCF7L2 target genes, including *Dkk1*, *Dkk3*, *Lrp5*, *Lef1*, *Tcf7l1*,

*Tgfb2*, *Ctbp2*, *Sox9*, *Cxcl12* and *Nfatc4*, in IPF lung and heart fibroblasts. Furthermore, pharmacological inhibition of Wnt/ $\beta$ -catenin signaling by the small molecule ICG-001, reduces proliferation and TGF- $\beta$ -induced myofibroblast differentiation of lung resident MSCs *in vitro* and triggers organ protection via attenuation of bleomycin-induced lung fibrosis *in vivo* (Cao et al., 2018). These studies, and others, suggest that the canonical Wnt cascade is required for TGF- $\beta$ -mediated effects, and vice versa (Cosin-Roger et al., 2019; Działo et al., 2018; Girardi and Le Grand, 2018; Piersma et al., 2015). Here, we hypothesize that extracellular TGF- $\beta$  release after injury primes PDGFR $\alpha^+$  progenitor cells into differentiating TCF7L2 non-expressing myofibroblasts, which are then refractory to the self-renewal Wnt signals. Central to this idea is the significance of restraining an exacerbated stromal response to control scar formation. Thus, Wnt–TCF7L2 and TGF- $\beta$  signaling could interact in a cell-specific and complex arrangement during regeneration and repair.

Emerging studies suggest a functional crosstalk between the Wnt cascade and TGF- $\beta$  signaling in modulating MSC activation and fate (Burgy and Königshoff, 2018; Cosin-Roger et al., 2019; Vallée et al., 2017; Hamburg-Shields et al., 2015). For example, the canonical WNT3A ligand upregulates TGF- $\beta$  signaling via SMAD2 in a  $\beta$ -catenin-dependent mechanism, and therefore, promotes the differentiation of fibroblasts into myofibroblasts (Carthy et al., 2011). Moreover, Wnt/ $\beta$ -catenin/TCF7L2 pathway mediates the transcriptional regulation of the TGF- $\beta$ -target gene, *Tmepai* (also known as *Pmepa1*; Nakano et al., 2010). TGF- $\beta$  promotes the secretion of Wnt proteins, via transforming growth factor-beta-activated kinase 1 (also known as MAP3K7) activation, which in turn activates the canonical Wnt cascade (Blyszczuk et al., 2016). Therefore, this TGF- $\beta$ -dependent Wnt secretion induces myofibroblast formation and myocardial fibrosis progression (Blyszczuk et al., 2016). Elevated canonical Wnt/ $\beta$ -catenin signaling is found in dystrophic *mdx* muscles and controls MuSC fate via crosstalk with TGF- $\beta$ 2 (Biressi et al., 2014). Also, TGF- $\beta$  induces the production of the canonical ligand WNT3A, which in turn increases TGF- $\beta$  secretion, establishing an amplification circuit between TGF- $\beta$  and Wnt signaling pathways in cardiac fibroblasts (Seo et al., 2019). Also, it has been demonstrated that TGF- $\beta$ 3-induced epithelial–mesenchymal transformation proceeds via transcription complexes of SMAD2–SMAD4–LEF1 that directly inhibit E-cadherin (*Cdh1*) gene expression (Nawshad et al., 2007). Tian et al. (2013) reported that  $\beta$ -catenin is a co-factor of SMAD3 during TGF- $\beta$ 1-mediated epithelial–mesenchymal transformation. Therefore, these studies and ours suggest a novel interplay between TGF- $\beta$  and the canonical Wnt pathway.

The study of the heterogeneity and plasticity of tissue-resident mesenchymal stromal populations emerges as an attractive field to understand the balance between regeneration and degenerative fibrosis (Riquelme-Guzmán and Contreras, 2020; Mahmoudi et al., 2019; Lemos and Duffield, 2018; Lynch and Watt, 2018). Different MSC populations and their lineages may have intrinsic properties that favor either permanent scar formation or regeneration via scar regression (Driskell et al., 2013; Malecova et al., 2018; Plikus et al., 2017; Rinkevich et al., 2015; Rognoni et al., 2018; Soliman et al., 2020; Furtado et al., 2016). Thus, investigating different sub-populations of fibroblasts, with particular niches and genetic programs, is important to understand how these cells and their progeny influence wound healing, tissue repair and regeneration. Dynamic downregulation of fibroblast markers following damage has also been identified in resident PDGFR $\alpha^+$  cardiac fibroblasts (Asli et al., 2019 preprint; Farbehi et al., 2019; Kanisicak et al.,

2016; Tallquist and Molkentin, 2017; Soliman et al., 2020) and skeletal muscle (Contreras et al., 2019c; Malecova et al., 2018). We have recently reported that the *in vivo* and *in vitro* expression of PDGFR $\alpha$  is strongly downregulated by damage-associated TGF- $\beta$  signaling in skeletal muscle and heart PDGFR $\alpha^+$  fibroblasts (Contreras et al., 2019c). Conversely, TGF- $\beta$  mediates the differentiation of PDGFR $\alpha^+$  cells into myofibroblasts at the expense of their adipogenic differentiation (Contreras et al., 2019c; Uezumi et al., 2014a, 2011). In summary, the work of others and our results suggest that stromal stem cell and/or progenitor markers are often downregulated by TGF- $\beta$ , probably after a complex array of niche signals during regeneration or disease, as cells change phenotypically towards an activated cell state. These mesenchymal progenitor and/or fibroblast downregulated markers include Sca-1, PDGFR $\alpha$ , TCF21 and HIC1 (Asli et al., 2019 preprint; Contreras, 2019d,c; Fu et al., 2018; Kanisicak et al., 2016; Scott et al., 2019; Soliman et al., 2020). With our work, we add TCF7L2 to this growing list.

Our understanding of the cellular and molecular determinants of fibrosis has advanced immensely (Ceco and McNally, 2013; Kim et al., 2018; Piersma et al., 2015; Smith and Barton, 2018). Nevertheless, the lack of successful antifibrotic therapy to date prompts us to continue the search for new potential candidates to fight against non-malignant proliferative disorders. Compelling evidence from this work raises the idea that TCF7L2 should be explored as a therapeutic target in fibrotic diseases, as the Wnt/ $\beta$ -catenin pathway emerges as a novel and attractive signaling cascade to target for the improvement of tissue function in myopathies, fibrosis-related disorders and aging.

## MATERIALS AND METHODS

### Mice and study approval

Housing, husbandry and experimental protocols were conducted in strict accordance and with the formal approval of the Animal Ethics Committee of the Pontificia Universidad Católica de Chile (doctoral ID protocol: 160512005) and following institutional and national guidelines at the University of British Columbia, Canada. Mice were housed in standard cages under 12 h light–dark cycles and fed *ad libitum* with a standard chow diet. Five-month-old C57BL/10ScScJ male mice (hereafter referred to as wild type; stock #000476) and dystrophic C57BL/10ScSn-*Dmd*<sup>*mdx*</sup>/J mice (stock #001801) male mice (both from Jackson Laboratories) were used in experiments for Figs 1E and 2, and Fig. S3H. *Pdgfra*<sup>*tm11(EGFP)Sor*</sup> mice (herein referred to as PDGFR $\alpha^{\text{H2BEGFP}}$  mice) were purchased from Jackson Laboratories (stock #007669 B6.129S4-Pdgfra<sup>*tm11(EGFP)Sor*</sup>/J; Hamilton et al., 2003). For FAP detection in *mdx* muscles, we crossed male C57Bl/10ScSn-*Dmd*<sup>*mdx*</sup> mice with hemizygous female B6.129S4-Pdgfra<sup>*tm11(EGFP)Sor*</sup>/J mice. We used the F1 male *mdx*;PDGFR $\alpha^{\text{H2BEGFP}}$  offspring (5- to 6-month-old), and the comparisons were performed among siblings. All surgeries were performed after the mice had been anesthetized with 2.5–3% of isoflurane gas in pure oxygen. The mice were euthanized with cervical dislocation at the ages indicated in each figure, and the tissues were immediately processed, either by direct freezing in liquid nitrogen for protein and RNA extraction or in 2-methylbutane cooled with liquid nitrogen for histological analysis as described below.

### Muscle acute injury

For acute glycerol injury, the tibialis anterior (TA) muscle from 2- to 3-month-old PDGFR $\alpha^{\text{H2BEGFP}}$  mice was injected with 50  $\mu$ l 50% v/v glycerol. Tissue collection was performed as indicated in the corresponding figures after glycerol injections. Notexin muscle damage was induced by intramuscular injection of 0.15  $\mu$ g notexin snake venom (Latoxan) into the TA muscle (Contreras et al., 2019c; Joe et al., 2010; Lemos et al., 2015). Non-injected muscles from the contralateral limb were used as controls. Muscles were isolated and collected for analysis at the indicated time points in the corresponding figures.

### Tissue preparation, flow cytometry and FACS

Tissue preparation for skeletal muscle and heart FAPs was performed as described previously (Contreras et al., 2019c; Soliman et al., 2020). One-step digestion of tissue for FAPs was performed mainly as described previously with some modifications (Judson et al., 2017; Lemos et al., 2015). All the steps were performed on ice unless otherwise specified. Briefly, skeletal muscle from both hindlimbs (limb FAPs) and diaphragm (diaphragm FAPs) was carefully dissected, washed with  $1\times$  PBS and cut into small pieces with scissors until homogeneous. Collagenase D (Roche Biochemicals) 1.5 U/ml and Dispase II (Roche Biochemicals) 2.4 U/ml, in 2.5 mM CaCl<sub>2</sub>, was added to every two hindlimbs in a total volume of 3 ml per mouse, and the preparation was placed at 37°C for 45 min with rotation. Preparations were passed through a 70  $\mu$ m, and then 40  $\mu$ m cell strainer (Becton Dickinson), and washed with FACS buffer (PBS, 2% FBS, 2 mM EDTA pH 7.9). Resulting single cells were collected by centrifugation at 1000 *g* for 5–10 min. Cell preparations were incubated with primary antibodies for 20–30 min at 4°C in FACS buffer at  $\sim 3\times 10^7$  cells/ml. We used the following monoclonal primary antibodies: anti-CD31 (clone MEC13.3, Cat. no. 553372, 1:400, Becton Dickinson; clone 390, Cat. no. CL8930F-3, 1:500, Cedarlane Laboratories), anti-CD45 (clone 30-F11, Cat. no. 557659, 1:400, Becton Dickinson), anti-CD45.1 (clone A20, Cat. no. 553775, 1:400, Becton Dickinson), anti-CD45.2 (clone 104, Cat. no. 11-0454-85, 1:200, eBiosciences), anti-Sca-1 (1:2000–1:5000, clone D7, Cat. no. 25-5981-82, Invitrogen) and anti- $\alpha 7$  integrin (1:11,500; Clone R2F2, Cat. no. 67-0010-05, AbLab). For all antibodies, we performed a fluorescence minus one control by staining with appropriate isotype control antibodies (rat anti-IgG2a kappa, PE-Cyanine7, clone eBR2a, Cat. no. 25-4321-82, eBioscience, 1:400; mouse anti-IgG2a  $\kappa$ , FITC, clone G155-178, Cat. no. 553456, BD, 1:100; rat anti-IgG2b  $\kappa$ , APC, clone eB149/10H5, Cat. no. 17-4031-82, eBioscience, 1:100). To assess viability, cells were stained with propidium iodide (1  $\mu$ g ml<sup>-1</sup>) and Hoechst 33342 (2.5  $\mu$ g ml<sup>-1</sup>) and resuspended at  $\sim 1\times 10^6$  cells ml<sup>-1</sup> immediately before sorting or analysis. The analysis was performed on an LSRII (Becton Dickinson) flow cytometer equipped with three lasers. Data were collected using FACS DIVA software (Becton Dickinson). Cell sorting was performed on a FACS Vantage SE (Becton Dickinson), BD Influx flow cytometer (Becton Dickinson), or FACS Aria (Becton Dickinson), all equipped with three lasers, using a 100  $\mu$ m nozzle at 18 p.s.i. to minimize the effects of pressure on the cells. Sorting gates were strictly defined based on isotype control (fluorescence minus one) stains. All flow cytometry data were analyzed using FlowJo 10.5.3v.

### Reagents

The TGFBR1 inhibitor SB525334 (used at 5  $\mu$ M; S8822, Sigma-Aldrich), p38 MAPK inhibitor SB203580 (used at 20  $\mu$ M; 5633, Cell Signaling Technology), MEK1/2 inhibitor (used to subsequently inhibit ERK1/2 kinases) UO126 (used at 10  $\mu$ M; 9903, Cell Signaling Technology), SMAD3 inhibitor SIS3 (used at 6  $\mu$ M; 1009104-85-1, Merck Calbiochem), JNK activity inhibitor SB600125 (used at 20  $\mu$ M; Cell Signaling Technology), trichostatin A (used at 10  $\mu$ M; T8552, Sigma-Aldrich; kindly provided by Dr Martín Montecino, Instituto de Ciencias Biomédicas, Universidad Andrés Bello, Santiago, Chile) and the inhibitor of USP7 activity HBX 41108 (used at 10  $\mu$ M; 4285; Tocris; kindly provided by Dr Hugo Olguín, Pontificia Universidad Católica de Chile, Santiago, Chile) were all diluted in DMSO. DMSO treatment alone was used as a control. Cycloheximide (C104450, Sigma-Aldrich) was diluted in ethanol and used at 30  $\mu$ g/ml final concentration. All the inhibitors used were added at the same time and co-incubated with TGF- $\beta$ 1. Other reagents, unless indicated otherwise, were purchased from Sigma-Aldrich.

### Cell culture and nuclei cytoplasmic fractionation

The murine mesenchymal stromal cell (MSC) cell line C3H/10T1/2, Clone 8, and the embryonic fibroblast cell line NIH-3T3 were obtained from the American Type Culture Collection (ATCC, VA) and grown at 37°C in 5% CO<sub>2</sub> in growth medium (GM): high-glucose Dulbecco's modified Eagle's medium (DMEM; Invitrogen) with 10% fetal bovine serum (FBS; Hyclone) and supplemented with antibiotics (Gutiérrez et al., 2015). The murine C2C12 myoblast cell line (ATCC) was cultured at 37°C in 8% CO<sub>2</sub> in

growth medium (GM): DMEM high glucose (Invitrogen, CA) with 10% fetal bovine serum (FBS; Hyclone, UT) and supplemented with antibiotics. Cells were treated with recombinant hTGF- $\beta$ 1 (#580702, Biolegend, USA), recombinant hTGF- $\beta$ 2 (#583301, Biolegend, USA), recombinant hTGF- $\beta$ 3 (#501123524, eBioscience, CA) in DMEM supplemented with 2% (v/v) FBS and penicillin/streptomycin in a 5% CO<sub>2</sub> atmosphere at the concentration and time indicated in the corresponding figure legend. Adipogenic or osteogenic differentiation of MEFs was induced for 28 d using a MesenCult Adipogenic Differentiation kit (Mouse) (STEMCELL Technologies, Canada) and MesenCult Osteogenic Stimulatory Kit (Mouse), respectively. Our cell cultures were periodically tested to ensure no mycoplasma contamination using PCR. Cell fractionation was performed mainly according to the principles of the rapid, efficient and practical (REAP) method for subcellular fractionation with a few modifications (Suzuki et al., 2010). Briefly, the initially PBS-scraped and pelleted cells were resuspended by pipetting and by vortexing for 5 s, using 900  $\mu$ l of 'cytoplasmic buffer' [10 mM Tris-HCl pH 7.5, 3 mM MgCl<sub>2</sub>, 100 mM NaCl, 1 mM EGTA, 0.25% (v/v) Nonidet P-40]. Next, 300  $\mu$ l of the initial lysate was removed and kept as whole cell lysate (referred to here as Ho) (Fig. 4A). The remaining ( $\sim 600$   $\mu$ l) material was centrifuged twice for 10 s in 1.5 ml micro-centrifuge tubes and 300  $\mu$ l of the supernatant was removed and kept as the cytosolic fraction. After the remaining supernatant was removed, the pellet ( $\sim 20$   $\mu$ l) was resuspended with 180  $\mu$ l of  $1\times$  Laemmli sample buffer and designated as the nuclear fraction. 100  $\mu$ l of  $4\times$  Laemmli sample buffer was added to both the whole cell lysate and the cytosolic fractions. Finally, samples were sonicated and 30  $\mu$ l, 30  $\mu$ l and 15  $\mu$ l of whole cell lysate, cytoplasmic and nuclear fractions, respectively, were loaded and electrophoresed using SDS-PAGE (see below).

### FAP cell culture

PDGFR $\alpha$ <sup>+</sup> FAPs were FACS-isolated from either wild-type or PDGFR $\alpha$ <sup>H2BEGFP/+</sup> mice and grown in high-glucose DMEM (Invitrogen), supplemented with 10% FBS, 1% sodium pyruvate and 2.5 ng/ml bFGF (Invitrogen) at a density of 15,000 cell/cm<sup>2</sup> in a 48-well plate or 24-well plate. Cells were isolated from undamaged muscles. For the TGF- $\beta$ 1 treatment experiment, after 72 h–96 h in culture and 70–80% confluence, FAPs were stimulated with 5 ng/ml TGF- $\beta$ 1 (Contreras et al., 2019c). Cells were then collected for further analyses.

### Protein extraction and western blot analysis

Protein extracts from cells were obtained using RIPA  $1\times$  lysis buffer (9806, Cell Signaling, MA) plus protease and phosphatase inhibitors (#P8340, #P0044, Sigma-Aldrich). Whole-muscle and heart extracts were obtained by homogenization at 4°C in RIPA  $1\times$  lysis buffer plus protease and phosphatase inhibitors. The cells were sonicated for 10 s and centrifuged at 9000 *g*. Whole-tissue homogenates were clarified by centrifugation at 10,000 *g* for 5 min. Proteins were quantified with the Micro BCA assay kit, following the manufacturer's instructions (Pierce, IL). Protein extracts (30–60  $\mu$ g) were subjected to SDS-PAGE in 9–10% (or 12% in Fig. S7B) polyacrylamide gels, transferred to PDVF membranes (Millipore, CA), and probed with primary antibodies: goat anti-PDGFR $\alpha$  (1:1000; AF1062, R&D Systems), rabbit anti-TCF4/TCF7L2 (C48H11, 1:1000; 2569, Cell Signaling), rabbit anti-c-Jun (60A8, 1:1000; 9165, Cell Signaling), rabbit anti- $\beta$ -catenin (1:2000; 9562, Cell Signaling), rabbit anti-histone H3 (1:1000; 9715, Cell Signaling), mouse anti-alpha smooth muscle actin ( $\alpha$ SMA; 1:2000; Cat. no. A5228, Sigma-Aldrich), goat anti-CCN2/CTGF (1:500; Cat. no. sc-14939, Santa Cruz Biotechnology), rabbit anti-integrin  $\beta$ 1 (M-106, 1:1000; sc-8978, Santa Cruz Biotechnology), rabbit anti-fibronectin (1:2000; F3648, Sigma-Aldrich), mouse anti-myosin skeletal fast (1:1000; M4276, Sigma-Aldrich), rabbit anti-myogenin (1:500; sc-576, Santa Cruz Biotechnology), mouse anti-GAPDH (1:5000; MAB374, Millipore), mouse anti- $\alpha$ -tubulin (1:5000; T5168, Sigma-Aldrich). Then, primary antibodies were detected with a secondary antibody conjugated to horseradish peroxidase: mouse anti-goat IgG (1:5000; 31400), goat anti-rabbit IgG (1:5000; 31460) and goat anti-mouse IgG (1:5000; 31430), all from Pierce. All immunoreactions were visualized by enhanced chemiluminescence Super Signal West Dura (34075, Pierce) or Super Signal West Femto (34096, Pierce) using a ChemiDoc-It HR 410 imaging

system (UVP). Western blot densitometry quantification was done using Fiji software (ImageJ version 2.0.0-rc/69/1.52n). Briefly, minimum brightness thresholds were increased to remove background signal. Remaining bands were bracketed, plot profiles generated, and area under histograms auto traced. Protein levels were normalized against the levels of the loading control. Ponceau S Red Staining Solution [0.1% (w/v) Ponceau S in 5% (v/v) acetic acid] was used to detect protein transfer.

### Indirect immunofluorescence and microscopy

Cell immunofluorescence was performed as previously described (Contreras et al., 2018). For tissue section immunofluorescence, flash-frozen muscles were sectioned at 7  $\mu$ m, fixed for 15 min in 4% paraformaldehyde, and washed in PBS. Cells and tissue sections were blocked for 30–60 min in 1% BSA with 1% fish gelatin in PBS, incubated overnight at 4°C in primary antibody: rat anti-laminin- $\alpha$ 2 (1:250, Cat. no. L0663, Sigma-Aldrich), rabbit anti-collagen type I (1:250, Cat. no. A34710, Abcam), rabbit anti phospho-SMAD3 antibody (1:100; Cat. no. 9520S, Cell Signaling), mouse anti-alpha smooth muscle actin ( $\alpha$ SMA; 1:250, Cat. no. A5228, Sigma-Aldrich). Then, samples were washed in PBS, incubated for 1 h or at room temperature with a secondary antibody (Alexa-Fluor-568 donkey anti-rabbit IgG (H+L), Cat. no. A10042, Life Technologies; Alexa-Fluor-594 donkey anti-rabbit IgG (H+L), Cat. no. A21207, Life Technologies; Alexa-Fluor-488 goat anti-rabbit IgG (H+L), 1:500, Cat. no. A11008, Life Technologies; Alexa-Fluor-555 donkey anti-mouse IgG (H+L), Cat. no. A31570, Invitrogen; Alexa-Fluor-568 goat anti-rat IgG (H+L), Cat. no. A11077, Life Technologies; all used at 1:500) and washed in PBS. Hoechst 33342 stain (2 mg/ml) and wheat germ agglutinin (WGA) Alexa Fluor 594 conjugate (#W11262, Invitrogen) were added for 10 min in PBS before the slides were mounted, according to the supplier's instructions. Slides were then washed in PBS and mounted with fluorescent mounting medium (DAKO, USA). To stain F-actin, Alexa Fluor 568 Phalloidin was added to the cells according to supplier's instructions for 10 min (#A12380, Thermo Fisher Scientific). Cells were imaged on a Nikon Eclipse C2 Si Confocal Spectral Microscope or Nikon Eclipse Ti Confocal Microscope using Nikon NIS-Elements AR software 4.00.00 (build 764) LO, 64 bit. Confocal images were acquired at the Unidad de Microscopía Avanzada (UMA), Pontificia Universidad Católica de Chile, using a Nikon Eclipse C2 Si confocal spectral microscope. Plan-Apochromat objectives were used (Nikon, VC 20 $\times$  DIC N2 NA 0.75, 40 $\times$  OIL DIC H NA 1.0 and VC 60 $\times$  OIL DIC NA 1.4). Cytospin confocal microscopy was performed using a Nikon eclipse Ti Confocal Microscope with a C2 laser unit. Confocal microscopy images shown in Figs 1G, 2C and Fig. S1G were composed using maximum-intensity projection z-stack reconstructions (0.3  $\mu$ m each stack) of 7- $\mu$ m-thick transversal sections or cultured cells. Then, we automatically analyzed the intensity of fluorescence (amount) of TCF7L2 in TCF7L2<sup>+</sup> cells using the analyze particles plugin, and manually counted cells using the cell counter plugin from Fiji software (ImageJ version 2.0.0-rc/69/1.52n, NIH, MD). Counts of 6–8 randomly chosen fields were averaged from four independent experiments.

### RNA isolation and reverse transcription qPCR

Total RNA from cultured cells was isolated using TRIzol (Invitrogen, CA) according to the manufacturer's instructions. RNA integrity was corroborated as described previously (Contreras et al., 2018). A total of 2  $\mu$ g RNA was reverse transcribed into cDNA using random primers and M-MLV reverse transcriptase (Invitrogen, CA). Reverse transcription qPCR (RT-qPCR) was performed in triplicate with the Eco Real-Time PCR System (Illumina, CA, USA), using primer sets (see Table S1) for detection of *Tcf7*, *Lef1*, *Tcf7l1* (*Tcf3*), *Tcf7l2* (*Tcf4*), *Cnd1* (encoding cyclin-D1), *Sox9*, *Axin2*, *Nfatc1*, *Ctnnb1* (encoding  $\beta$ -catenin) and the housekeeping gene *18s* (used as a reference gene). The  $\Delta\Delta$ Ct method was used for quantification, and mRNA levels were expressed relative to the mean level of the control condition in each case. We analyzed and validated each RT-qPCR expected gene product using a 2% agarose gel. Digital droplet PCR was performed as previously described (Soliman et al., 2020). Gene expression analysis was performed using Taqman Gene Expression assays (Applied Biosystems), on a 7900HT Real Time PCR system (Applied Biosystems). Sequence information for the primers contained in the

Taqman assays is as follows. Taqman probes (Thermo Fisher Scientific): *Tcf7l2* mouse (Mm00501505\_m1), *Tcf7l1* mouse (Mm01188711\_m1), *Lef1* mouse (Mm00550265\_m1), *Tcf7* mouse (Mm00493445\_m1), *Rumx2* mouse (Hs01047973\_m1), *Adipoq* (Hs00605917\_m1) and the housekeeping gene *Hprt* mouse (Mm03024075\_m1). Data were acquired and analyzed using SDS 2.0 and SDS RQ Manager software (Applied Biosystems).

### Computational BioGRID database, ubiquitination, and Tabula Muris open source database

The image in Fig. 6D was generated using BioGRID, based on the human TCF7L2 interactome (Stark et al., 2006). The data from figures and tables in the BioGRID webpage (<https://thebiogrid.org/>) can be searched and sorted. For post-translational modification detection and delineation of ubiquitination at a site-specific level we used the UbiSite webpage (<http://csb.cse.yzu.edu.tw/UbiSite/>) (Akimov et al., 2018), and we corroborated the findings using UbPred (<http://www.ubpred.org>) and BDM-PUB (<http://bdmpub.biocuckoo.org/>). The murine Tabula Muris open database was used to generate the figures shown in Fig. S1F,G (The Tabula Muris Consortium et al., 2018). Data were extracted and analyzed for total tissues, diaphragm, and limb muscles.

### Statistical analysis

Mean $\pm$ s.e.m. values, as well as the number of experiments performed, are indicated in each figure. All datasets were analyzed for normal distribution using the D'Agostino normality test. Statistical significance of the differences between the means was evaluated using the one-way analysis of variance (ANOVA) test followed by post-hoc Dunnett's multiple comparison test, and the significance level set at  $P < 0.05$ . A two-tailed Student's  $t$ -test was performed when two conditions were compared. Differences were considered significant with  $P < 0.05$ . Data were collected in Microsoft Excel, and statistical analyses were performed using Prism 8 software for MacOS (GraphPad).

### Acknowledgements

We are grateful to the Unidad de Microscopía Avanzada (UMA) of Pontificia Universidad Católica de Chile for its support in image acquisition. We acknowledge the services provided by the UC CINBIOT Animal Facility funded by the PIA CONICYT ECM-07 Program for Associative Research, of the Chilean National Council for Science and Technology. We also acknowledge the animal unit staff and genotyping core facility at the Biomedical Research Centre (University of British Columbia), especially Mr Taka Murakami, Mrs Krista Ranta, and Mr Wei Yuan. We thank Mr Andy Johnson and Mr Justin Wong of UBC Flow Cytometry. We also acknowledge Martin Arostegui from Michael T. Underhill's Lab (Biomedical Research Centre, University of British Columbia) for helping with MEF culture. We acknowledge the laboratory of Dr Hugo Olguín (Pontificia Universidad Católica de Chile) for kindly providing the USP7 small-molecule inhibitor HBX 41108, and also the laboratory of Dr Martín Montecino (Instituto de Ciencias Biomédicas, Universidad Andrés Bello) for kindly providing trichostatin A. For administrative assistance, we thank Ms Vanessa Morales and Mrs Vittoria Canale. We finally acknowledge Mr Eduardo Ramirez and Ms Darling Vera for their technical support.

### Competing interests

The authors declare no competing or financial interests.

### Author contributions

Conceptualization: O.C., E.B.; Methodology: O.C., H.S., M.T.; Software: O.C.; Validation: O.C., H.S., M.T., F.M.V.R., E.B.; Formal analysis: O.C.; Investigation: O.C., H.S., M.T.; Resources: O.C., F.M.V.R., E.B.; Data curation: O.C.; Writing - original draft: O.C.; Writing - review & editing: O.C., H.S., M.T., F.M.V.R., E.B.; Visualization: O.C.; Supervision: O.C., F.M.V.R., E.B.; Project administration: O.C., E.B.; Funding acquisition: O.C., F.M.V.R., E.B.

### Funding

Fondo Nacional de Desarrollo Científico y Tecnológico (FONDECYT) grants 115016 and 1190144, Comisión Nacional de Investigación Científica y Tecnológica (CONICYT) grant AFB170005 to E.B.; Comisión Nacional de Investigación Científica y Tecnológica (CONICYT) Beca de Doctorado Nacional Folio 21140378 'National Doctorate Fellowship' to O.C.; and Canadian Institutes of Health Research (CIHR) grant FDN-159908 to F.M.V.R. supported this work. The funding agencies had no role in the design of the study, data collection, analysis, the decision to publish or preparation of the manuscript.

## Supplementary information

Supplementary information available online at  
<http://jcs.biologists.org/lookup/doi/10.1242/jcs.242297.supplemental>

## Peer review history

The peer review history is available online at  
<https://jcs.biologists.org/lookup/doi/10.1242/jcs.242297.reviewer-comments.pdf>

## References

- Aberle, H., Bauer, A., Stappert, J., Kispert, A. and Kemler, R. (1997).  $\beta$ -catenin is a target for the ubiquitin–proteasome pathway. *EMBO J.* **16**, 3797–3804. doi:10.1093/emboj/16.13.3797
- Accornero, F., Kanisicak, O., Tjondrokoesoemo, A., Attia, A. C., McNally, E. M. and Molkenin, J. D. (2014). Myofiber-specific inhibition of TGF $\beta$  signaling protects skeletal muscle from injury and dystrophic disease in mice. *Hum. Mol. Genet.* **23**, 6903–6915. doi:10.1093/hmg/ddu413
- Acuña, M. J., Pessina, P., Olguin, H., Cabrera, D., Vio, C. P., Bader, M., Munoz-Canoves, P., Santos, R. A., Cabello-Verrugio, C. and Brandan, E. (2014). Restoration of muscle strength in dystrophic muscle by angiotensin-1-7 through inhibition of TGF-beta signalling. *Hum. Mol. Genet.* **23**, 1237–1249. doi:10.1093/hmg/ddt514
- Agley, C. C., Rowlerson, A. M., Velloso, C. P., Lazarus, N. R. and Harridge, S. D. R. (2013). Human skeletal muscle fibroblasts, but not myogenic cells, readily undergo adipogenic differentiation. *J. Cell Sci.* **126**, 5610–5625. doi:10.1242/jcs.132563
- Akhmetshina, A., Palumbo, K., Dees, C., Bergmann, C., Venalis, P., Zerr, P., Horn, A., Kireva, T., Beyer, C., Zwerina, J. et al. (2012). Activation of canonical Wnt signalling is required for TGF- $\beta$ -mediated fibrosis. *Nat. Commun.* **3**, 735. doi:10.1038/ncomms1734
- Akimov, V., Barrio-Hernandez, I., Hansen, S. V. F., Hallenborg, P., Pedersen, A.-K., Bekker-Jensen, D. B., Puglia, M., Christensen, S. D. K., Vanselow, J. T., Nielsen, M. M. et al. (2018). UbiSite approach for comprehensive mapping of lysine and N-terminal ubiquitination sites. *Nat. Struct. Mol. Biol.* **25**, 631–640. doi:10.1038/s41594-018-0084-y
- Asli, N. S., Xaymardan, M., Patrick, R., Farbehi, N., Cornwell, J., Forte, E., Waardenberg, A. J., Janbandhu, V., Kesteven, S., Chandrakanthan, V. et al. (2019). PDGFR $\alpha$  signaling in cardiac fibroblasts modulates quiescence, metabolism and self-renewal, and promotes anatomical and functional repair. *BioRxiv*, 225979. doi:10.1101/225979
- Bernasconi, P., Di Blasi, C., Mora, M., Morandi, L., Galbiati, S., Confalonieri, P., Cornelio, F. and Mantegazza, R. (1999). Transforming growth factor-beta1 and fibrosis in congenital muscular dystrophies. *Neuromuscul. Disord.* **9**, 28–33. doi:10.1016/S0960-8966(98)00093-5
- Bettica, P., Petrini, S., D'oria, V., D'amico, A., Catteruccia, M., Pane, M., Sivo, S., Magri, F., Brajkovic, S., Messina, S. et al. (2016). Histological effects of givinostat in boys with Duchenne muscular dystrophy. *Neuromuscul. Disord.* **26**, 643–649. doi:10.1016/j.nmd.2016.07.002
- Biressi, S., Miyabara, E. H., Gopinath, S. D., Carlig, P. M. M. and Rando, T. A. (2014). A Wnt-TGF2 axis induces a fibrogenic program in muscle stem cells from dystrophic mice. *Sci. Transl. Med.* **6**, 267ra176. doi:10.1126/scitranslmed.3008411
- Blyszczuk, P., Müller-Edenborn, B., Valenta, T., Osto, E., Stellato, M., Behnke, S., Glatz, K., Basler, K., Lüscher, T. F. and Distler, O. (2016). Transforming growth factor- $\beta$ -dependent Wnt secretion controls myofibroblast formation and myocardial fibrosis progression in experimental autoimmune myocarditis. *Eur. Heart J.* **38**, 1413–1425. doi:10.1093/eurheartj/ehw116
- Bolden, J. E., Peart, M. J. and Johnstone, R. W. (2006). Anticancer activities of histone deacetylase inhibitors. *Nat. Rev. Drug Discov.* **5**, 769–784. doi:10.1038/nrd2133
- Brack, A. S., Conboy, M. J., Roy, S., Lee, M., Kuo, C. J., Keller, C. and Rando, T. A. (2007). Increased Wnt signaling during aging alters muscle stem cell fate and increases fibrosis. *Science* **317**, 807–810. doi:10.1126/science.1144090
- Braun, T., Buschhausen-Denker, G., Bober, E., Tannich, E. and Arnold, H. H. (1989). A novel human muscle factor related to but distinct from MyoD1 induces myogenic conversion in 10T1/2 fibroblasts. *EMBO J.* **8**, 701–709. doi:10.1002/j.1460-2075.1989.tb03429.x
- Burgy, O. and Königshoff, M. (2018). The WNT signaling pathways in wound healing and fibrosis. *Matrix Biol.* **68–69**, 67–80. doi:10.1016/j.matbio.2018.03.017
- Cadigan, K. M. and Waterman, M. L. (2012). TCF/LEFs and Wnt signaling in the nucleus. *Cold Spring Harbor Perspect. Biol.* **4**, a007906. doi:10.1101/cshperspect.a007906
- Callahan, J. F., Burgess, J. L., Fornwald, J. A., Gaster, L. M., Harling, J. D., Harrington, F. P., Heer, J., Kwon, C., Lehr, R., Mathur, A. et al. (2002). Identification of novel inhibitors of the transforming growth factor  $\beta$ 1 (TGF- $\beta$ 1) type 1 receptor (ALK5). *J. Med. Chem.* **45**, 999–1001. doi:10.1021/jm010493y
- Cao, H., Wang, C., Chen, X., Hou, J., Xiang, Z., Shen, Y. and Han, X. (2018). Inhibition of Wnt/ $\beta$ -catenin signaling suppresses myofibroblast differentiation of lung resident mesenchymal stem cells and pulmonary fibrosis. *Sci. Rep.* **8**, 13644. doi:10.1038/s41598-018-28968-9
- Carr, M. J., Toma, J. S., Johnston, A. P. W., Steadman, P. E., Yuzwa, S. A., Mahmud, N., Frankland, P. W., Kaplan, D. R. and Miller, F. D. (2019). Mesenchymal precursor cells in adult nerves contribute to mammalian tissue repair and regeneration. *Cell Stem Cell* **24**, 240–256.e9. doi:10.1016/j.stem.2018.10.024
- Carthy, J. M., Garmaroudi, F. S., Luo, Z. and Mcmanus, B. M. (2011). Wnt3a induces myofibroblast differentiation by upregulating TGF- $\beta$  signaling through SMAD2 in a  $\beta$ -catenin-dependent manner. *PLoS ONE* **6**, e19809. doi:10.1371/journal.pone.0019809
- Ceco, E. and McNally, E. M. (2013). Modifying muscular dystrophy through transforming growth factor- $\beta$ . *FEBS J.* **280**, 4198–4209. doi:10.1111/febs.12266
- Chen, X., Ayala, I., Shannon, C., Fourcaudot, M., Acharya, N. K., Jenkinson, C. P., Heikkinen, S. and Norton, L. (2018). The diabetes gene and Wnt pathway effector TCF7L2 regulates adipocyte development and function. *Diabetes* **67**, 554–568. doi:10.2337/db17-0318
- Chilosi, M., Poletti, V., Zamò, A., Lestani, M., Montagna, L., Piccoli, P., Pedron, S., Bertaso, M., Scarpa, A., Murer, B. et al. (2003). Aberrant Wnt/ $\beta$ -catenin pathway activation in idiopathic pulmonary fibrosis. *Am. J. Pathol.* **162**, 1495–1502. doi:10.1016/S0002-9440(10)64282-4
- Cho, N., Razipour, S. E. and McCain, M. L. (2018). TGF- $\beta$ 1 dominates extracellular matrix rigidity for inducing differentiation of human cardiac fibroblasts to myofibroblasts. *Exp. Biol. Med.* **243**, 601–612. doi:10.1177/1535370218761628
- Chong, J. J. H., Chandrakanthan, V., Xaymardan, M., Asli, N. S., Li, J., Ahmed, I., Heffernan, C., Menon, M. K., Scarlett, C. J., Rashidianfar, A. et al. (2011). Adult cardiac-resident MSC-like stem cells with a proepicardial origin. *Cell Stem Cell* **9**, 527–540. doi:10.1016/j.stem.2011.10.002
- Cisternas, P., Henriquez, J. P., Brandan, E. and Inestrosa, N. C. (2014). Wnt signaling in skeletal muscle dynamics: myogenesis, neuromuscular synapse and fibrosis. *Mol. Neurobiol.* **49**, 574–589. doi:10.1007/s12035-013-8540-5
- Clevers, H. (2006). Wnt/ $\beta$ -catenin signaling in development and disease. *Cell* **127**, 469–480. doi:10.1016/j.cell.2006.10.018
- Cohn, R. D., Van Erp, C., Habashi, J. P., Soleimani, A. A., Klein, E. C., Lisi, M. T., Gamradt, M., Ap Rhye, C. M., Holm, T. M., Loeyes, B. L. et al. (2007). Angiotensin II type 1 receptor blockade attenuates TGF-beta-induced failure of muscle regeneration in multiple myopathic states. *Nat. Med.* **13**, 204–210. doi:10.1038/nm1536
- Colland, F., Formstecher, E., Jacq, X., Reverdy, C., Planquette, C., Conrath, S., Trouplin, V., Bianchi, J., Aushev, V. N. and Camonis, J. (2009). Small-molecule inhibitor of USP7/HAUSP ubiquitin protease stabilizes and activates p53 in cells. *Mol. Cancer Ther.* **8**, 2286–2295. doi:10.1158/1535-7163.MCT-09-0097
- Colwell, A. S., Krummel, T. M., Longaker, M. T. and Lorenz, H. P. (2006). Wnt-4 expression is increased in fibroblasts after TGF-beta1 stimulation and during fetal and postnatal wound repair. *Plast. Reconstr. Surg* **117**, 2297–2301. doi:10.1097/01.prs.0000218708.16909.31
- Contreras, O., Rebollo, D. L., Oyarzun, J. E., Olguin, H. C. and Brandan, E. (2016). Connective tissue cells expressing fibro/adipogenic progenitor markers increase under chronic damage: relevance in fibroblast-myofibroblast differentiation and skeletal muscle fibrosis. *Cell Tissue Res.* **364**, 647–660. doi:10.1007/s00441-015-2343-0
- Contreras, O., Villarreal, M. and Brandan, E. (2018). Nilotinib impairs skeletal myogenesis by increasing myoblast proliferation. *Skelet Muscle* **8**, 5. doi:10.1186/s13395-018-0150-5
- Contreras, O. (2019d). Hic1 deletion unleashes quiescent connective tissue stem cells and impairs skeletal muscle regeneration. *J. Cell Commun. Signal.* **14**, 131–133. doi:10.1007/s12079-019-00545-3
- Contreras, O., Rebollo, D., Oyarzún, J. and Brandan, E. (2019a). Fibroblasts (Tcf4) and mesenchymal progenitors (PDGFR $\alpha$ ) correspond to the same cell type and are increased in skeletal muscle dystrophy, denervation and chronic damage [version 1; not peer reviewed]. *F1000Research* **8**, 299.
- Contreras, O., Rossi, F. M. and Brandan, E. (2019b). Adherent muscle connective tissue fibroblasts are phenotypically and biochemically equivalent to stromal fibro/adipogenic progenitors. *Matrix Biol. Plus* **2**, 100006. doi:10.1016/j.mbps.2019.04.003
- Contreras, O., Cruz-Soca, M., Theret, M., Soliman, H., Tung, L. W., Groppa, E., Rossi, F. M. and Brandan, E. (2019c). Cross-talk between TGF- $\beta$  and PDGFR $\alpha$  signaling pathways regulates the fate of stromal fibro–adipogenic progenitors. *J. Cell Sci.* **132**, 232157. doi:10.1242/jcs.232157
- Cosin-Roger, J., Ortiz-Masià, M. D. and Barrachina, M. D. (2019). Macrophages as an emerging source of wnt ligands: relevance in mucosal integrity. *Front. Immunol.* **10**, 2297. doi:10.3389/fimmu.2019.02297
- Danna, N. R., Beutel, B. G., Campbell, K. A. and Bosco, J. A. III (2014). Therapeutic approaches to skeletal muscle repair and healing. *Sports Health* **6**, 348–355. doi:10.1177/1941738113512261
- David, C. J. and Massagué, J. (2018). Contextual determinants of TGF $\beta$  action in development, immunity and cancer. *Nat. Rev. Mol. Cell Biol.* **19**, 419–435. doi:10.1038/s41580-018-0007-0
- De La Vega, E., González, N., Cabezas, F., Montecino, F., Blanco, N. and Olguin, H. (2020). Usp7-Dependent control of myogenic stability is required for terminal differentiation in skeletal muscle progenitors. *FEBS J.* febs.15269. doi:10.1111/febs.15269



- Derynck, R. and Budi, E. H.** (2019). Specificity, versatility, and control of TGF- $\beta$  family signaling. *Sci. Signal.* **12**, eaav5183. doi:10.1126/scisignal.aav5183
- Driskell, R. R., Lichtenberger, B. M., Hoste, E., Kretzschmar, K., Simons, B. D., Charalambous, M., Ferron, S. R., Herault, Y., Pavlovic, G., Ferguson-Smith, A. C. et al.** (2013). Distinct fibroblast lineages determine dermal architecture in skin development and repair. *Nature* **504**, 277-281. doi:10.1038/nature12783
- Droguett, R., Cabello-Verrugio, C., Riquelme, C. and Brandan, E.** (2006). Extracellular proteoglycans modify TGF- $\beta$  bio-availability attenuating its signaling during skeletal muscle differentiation. *Matrix Biol.* **25**, 332-341. doi:10.1016/j.matbio.2006.04.004
- Dulauroy, S., Di Carlo, S. E., Langa, F., Eberl, G. and Peduto, L.** (2012). Lineage tracing and genetic ablation of ADAM12(+) perivascular cells identify a major source of profibrotic cells during acute tissue injury. *Nat. Med.* **18**, 1262-1270. doi:10.1038/nm.2848
- Dziado, E., Tkacz, K. and Błyszczuk, P.** (2018). Crosstalk between the TGF- $\beta$  and WNT signalling pathways during cardiac fibrogenesis. *Acta Biochim. Pol.* **65**, 341-349. doi:10.18388/abp.2018\_2635
- Elfert, S., Weise, A., Bruser, K., Biniossek, M. L., Jäggle, S., Senghaas, N. and Hecht, A.** (2013). Acetylation of human TCF4 (TCF7L2) proteins attenuates inhibition by the HBP1 repressor and induces a conformational change in the TCF4::DNA complex. *PLoS ONE* **8**, e61867. doi:10.1371/journal.pone.0061867
- Farbehi, N., Patrick, R., Dorison, A., Xaymardan, M., Janbandhu, V., Wystub-Lis, K., Ho, J. W. K., Nordon, R. E. and Harvey, R. P.** (2019). Single-cell expression profiling reveals dynamic flux of cardiac stromal, vascular and immune cells in health and injury. *eLife* **8**, e43882. doi:10.7554/eLife.43882
- Frietze, S., Wang, R., Yao, L., Tak, Y., Ye, Z., Gaddis, M., Witt, H., Farnham, P. and Jin, V.** (2012). Cell type-specific binding patterns reveal that TCF7L2 can be tethered to the genome by association with GATA3. *Genome Biol.* **13**, R52. doi:10.1186/gb-2012-13-9-r52
- Fu, X., Khalil, H., Kanisicak, O., Boyer, J. G., Vagnozzi, R. J., Maliken, B. D., Sargent, M. A., Prasad, V., Valiente-Alandi, I., Blaxall, B. C. et al.** (2018). Specialized fibroblast differentiated states underlie scar formation in the infarcted mouse heart. *J. Clin. Invest.* **128**, 2127-2143. doi:10.1172/JCI98215
- Furtado, M. B., Nim, H. T., Boyd, S. E. and Rosenthal, N. A.** (2016). View from the heart: cardiac fibroblasts in development, scarring and regeneration. *Development* **143**, 387-397. doi:10.1242/dev.120576
- Girardi, F. and Le Grand, F.** (2018). Chapter five - wnt signaling in skeletal muscle development and regeneration. In *WNT Signaling in Health and Disease*, Vol. 153 (ed. J. Larraín & G. B. T.-P. in M. B. and T. S. Olivares), pp. 157-179. Academic Press.
- González, D., Contreras, O., Rebolledo, D. L., Espinoza, J. P., Van Zundert, B. and Brandan, E.** (2017). ALS skeletal muscle shows enhanced TGF- $\beta$  signaling, fibrosis and induction of fibro/adipogenic progenitor markers. *PLoS ONE* **12**, e0177649. doi:10.1371/journal.pone.0177649
- Gosselin, L. E., Williams, J. E., Deering, M., Brazeau, D., Koury, S. and Martinez, D. A.** (2004). Localization and early time course of TGF- $\beta$ 1 mRNA expression in dystrophic muscle. *Muscle Nerve* **30**, 645-653. doi:10.1002/mus.20150
- Götze, S., Coersmeyer, M., Müller, O. and Sievers, S.** (2014). Histone deacetylase inhibitors induce attenuation of Wnt signaling and TCF7L2 depletion in colorectal carcinoma cells. *Int. J. Oncol.* **45**, 1715-1723. doi:10.3892/ijo.2014.2550
- Grant, S. F. A., Thorleifsson, G., Reynisdottir, I., Benediktsson, R., Manolescu, A., Sainz, J., Helgason, A., Stefansson, H., Emilsson, V., Helgadóttir, A. et al.** (2006). Variant of transcription factor 7-like 2 (TCF7L2) gene confers risk of type 2 diabetes. *Nat. Genet.* **38**, 320-323. doi:10.1038/ng1732
- Greer, C. B., Tanaka, Y., Kim, Y. J., Xie, P., Zhang, M. Q., Park, I.-H. and Kim, T. H.** (2015). Histone deacetylases positively regulate transcription through the elongation machinery. *Cell Reports* **13**, 1444-1455. doi:10.1016/j.celrep.2015.10.013
- Gutierrez, J., Droppelmann, C. A., Contreras, O., Takahashi, C. and Brandan, E.** (2015). RECK-mediated  $\beta$ 1-integrin regulation by TGF- $\beta$ 1 is critical for wound contraction in mice. *PLoS ONE* **10**, e0135005. doi:10.1371/journal.pone.0135005
- Hamburg-Shields, E., Dinuoscio, G. J., Mullin, N. K., Lafyatis, R. and Atit, R. P.** (2015). Sustained  $\beta$ -catenin activity in dermal fibroblasts promotes fibrosis by up-regulating expression of extracellular matrix protein-coding genes. *J. Pathol.* **235**, 686-697. doi:10.1002/path.4481
- Hamilton, T. G., Klinghoffer, R. A., Corrin, P. D. and Soriano, P.** (2003). Evolutionary divergence of platelet-derived growth factor alpha receptor signaling mechanisms. *Mol. Cell. Biol.* **23**, 4013-4025. doi:10.1128/MCB.23.11.4013-4025.2003
- Han, W., Lee, H. and Han, J.-K.** (2017). Ubiquitin C-terminal hydrolase37 regulates Tcf7 DNA binding for the activation of Wnt signalling. *Sci. Rep.* **7**, 42590. doi:10.1038/srep42590
- He, W., Dai, C., Li, Y., Zeng, G., Monga, S. P. and Liu, Y.** (2009). Wnt/ $\beta$ -catenin signaling promotes renal interstitial fibrosis. *J. Am. Soc. Nephrol.* **20**, 765-776. doi:10.1681/ASN.2008060566
- He, W., Zhang, L., Ni, A., Zhang, Z., Mirotso, M., Mao, L., Pratt, R. E. and Dzau, V. J.** (2010). Exogenously administered secreted frizzled related protein 2 (Sfrp2) reduces fibrosis and improves cardiac function in a rat model of myocardial infarction. *Proc. Natl Acad. Sci. USA*, **107**, 21110-21115. doi:10.1073/pnas.1004708107
- Henderson, W. R., Chi, E. Y., Ye, X., Nguyen, C., Tien, Y.-., Zhou, B., Borok, Z., Knight, D. A. and Kahn, M.** (2010). Inhibition of Wnt/ $\beta$ -catenin/CREB binding protein (CBP) signaling reverses pulmonary fibrosis. *Proc. Natl Acad. Sci. USA* **107**, 14309-14314. doi:10.1073/pnas.1001520107
- Heredia, J. E., Mukundan, L., Chen, F. M., Mueller, A. A., Deo, R. C., Locksley, R. M., Rando, T. A. and Chawla, A.** (2013). Type 2 innate signals stimulate fibro/adipogenic progenitors to facilitate muscle regeneration. *Cell* **153**, 376-388. doi:10.1016/j.cell.2013.02.053
- Ieronimakis, N., Hays, A., Prasad, A., Janebodin, K., Duffield, J. S. and Reyes, M.** (2016). PDGFR $\alpha$  signalling promotes fibrogenic responses in collagen-producing cells in Duchenne muscular dystrophy. *J. Pathol.* **240**, 410-424. doi:10.1002/path.4801
- Ishitani, T., Ninomiya-Tsuji, J. and Matsumoto, K.** (2003). Regulation of lymphoid enhancer factor 1/T-Cell factor by mitogen-activated protein kinase-related nemolike kinase-dependent phosphorylation in Wnt/ $\beta$ -catenin signaling. *Mol. Cell. Biol.* **23**, 1379-1389. doi:10.1128/MCB.23.4.1379-1389.2003
- Jin, T.** (2016). Current understanding on role of the Wnt signaling pathway effector TCF7L2 in glucose homeostasis. *Endocr. Rev.* **37**, 254-277. doi:10.1210/er.2015-1146
- Joe, A. W., Yi, L., Natarajan, A., Le Grand, F., So, L., Wang, J., Rudnicki, M. A. and Rossi, F. M.** (2010). Muscle injury activates resident fibro/adipogenic progenitors that facilitate myogenesis. *Nat. Cell Biol.* **12**, 153-163. doi:10.1038/ncb2015
- Jones, D. L., Haak, A. J., Caporarello, N., Choi, K. M., Ye, Z., Yan, H., Varelas, X., Ordog, T., Ligresti, G. and Tschumperlin, D. J.** (2019). TGF $\beta$ -induced fibroblast activation requires persistent and targeted HDAC-mediated gene repression. *J. Cell Sci.* **132**, jcs233486. doi:10.1242/jcs.233486
- Juban, G., Saclier, M., Yacoub-Youssef, H., Kernou, A., Arnold, L., Boisson, C., Ben Larbi, S., Magnan, M., Cuvelier, S., Théret, M. et al.** (2018). AMPK activation regulates LTBP4-dependent TGF- $\beta$ 1 secretion by pro-inflammatory macrophages and controls fibrosis in Duchenne muscular dystrophy. *Cell Rep.* **25**, 2163-2176.e6. doi:10.1016/j.celrep.2018.10.077
- Judson, R. N., Low, M., Eisner, C. and Rossi, F. M.** (2017). Isolation, culture, and differentiation of fibro/adipogenic progenitors (FAPs) from skeletal muscle. *Methods Mol. Biol.* **1668**, 93-103. doi:10.1007/978-1-4939-7283-8\_7
- Kanisicak, O., Khalil, H., Ivey, M. J., Karch, J., Maliken, B. D., Correll, R. N., Brody, M. J., Lin, S.-C., Aronow, B. J., Tallquist, M. D. et al.** (2016). Genetic lineage tracing defines myofibroblast origin and function in the injured heart. *Nat. Commun.* **7**, 12260. doi:10.1038/ncomms12260
- Kardon, G., Harfe, B. D. and Tabin, C. J.** (2003). A Tcf4-positive mesodermal population provides a prepattern for vertebrate limb muscle patterning. *Dev. Cell* **5**, 937-944. doi:10.1016/S1534-5807(03)00360-5
- Kim, K. K., Sheppard, D. and Chapman, H. A.** (2018). TGF- $\beta$ 1 signaling and tissue fibrosis. *Cold Spring Harb. Perspect Biol.* **10**, 1-35. doi:10.1101/cshperspect.a022293
- Konigsho, M., Balsara, N., Pfaff, E.-M., Kramer, M., Chrobak, I., Seeger, W. and Eickelberg, O.** (2008). Functional Wnt signaling is increased in idiopathic pulmonary fibrosis. *PLoS ONE* **3**, e2142. doi:10.1371/journal.pone.0002142
- Kopinke, D., Roberson, E. C. and Reiter, J. F.** (2017). Ciliary hedgehog signaling restricts injury-induced adipogenesis. *Cell* **170**, 340-351.e312. doi:10.1016/j.cell.2017.06.035
- Korinek, V., Barker, N., Morin, P. J., Van Wichen, D., De Weger, R., Kinzler, K. W., Vogelstein, B. and Clevers, H.** (1997). Constitutive transcriptional activation by a beta-catenin-Tcf complex in APC-/- colon carcinoma. *Science* **275**, 1784-1787. doi:10.1126/science.275.5307.1784
- Korinek, V., Barker, N., Moerer, P. and Van Donselaar, E., Huls, G., Peters, P. J. and Clevers, H.** (1998). Depletion of epithelial stem-cell compartments in the small intestine of mice lacking Tcf-4. *Nat. Genet.* **18**, 379-383. doi:10.1038/1270
- Lemos, D. R. and Duffield, J. S.** (2018). Tissue-resident mesenchymal stromal cells: Implications for tissue-specific antifibrotic therapies. *Sci. Transl. Med.* **10**, eaan5174. doi:10.1126/scitranslmed.aan5174
- Lemos, D. R., Babaeijandaghi, F., Low, M., Chang, C.-K., Lee, S. T., Fiore, D., Zhang, R.-H., Natarajan, A., Nedospasov, S. A. and Rossi, F. M. V.** (2015). Nilotinib reduces muscle fibrosis in chronic muscle injury by promoting TNF-mediated apoptosis of fibro/adipogenic progenitors. *Nat. Med.* **21**, 786-794. doi:10.1038/nm.3869
- Lepper, C., Partridge, T. A. and Fan, C. M.** (2011). An absolute requirement for Pax7-positive satellite cells in acute injury-induced skeletal muscle regeneration. *Development* **138**, 3639-3646. doi:10.1242/dev.067595
- Lien, W. H. and Fuchs, E.** (2014). Wnt some lose some: transcriptional governance of stem cells by Wnt/ $\beta$ -catenin signaling. *Genes Dev.* **28**, 1517-1532. doi:10.1101/gad.244772.114
- Lien, W. H., Polak, L., Lin, M., Lay, K., Zheng, D. and Fuchs, E.** (2014). In vivo transcriptional governance of hair follicle stem cells by canonical Wnt regulators. *Nat. Cell Biol.* **16**, 179-190. doi:10.1038/ncb2903

- Liu, L., Carron, B., Yee, H. T., Yie, T.-A., Hajjou, M. and Rom, W. (2009). Wnt pathway in pulmonary fibrosis in the bleomycin mouse model. *J. Environ. Pathol. Toxicol. Oncol.* **28**, 99-108. doi:10.1615/JEnvironPatholToxicolOncol.v28.i2.20
- Lukjanenko, L., Karaz, S., Stuelsatz, P., Gurriaran-Rodriguez, U., Michaud, J., Dammone, G., Sizzano, F., Mashinchian, O., Ancel, S., Migliavacca, E. et al. (2019). Aging disrupts muscle stem cell function by impairing matricellular WISP1 secretion from fibro-adipogenic progenitors. *Stem Cell* **24**, 433-446.e7. doi:10.1016/j.stem.2018.12.014
- Lynch, M. D. and Watt, F. M. (2018). Fibroblast heterogeneity: implications for human disease. *J. Clin. Investig* **128**, 26-35. doi:10.1172/JCI93555
- Mackey, A. L., Magnan, M., Chazaud, B. and Kjaer, M. (2017). Human skeletal muscle fibroblasts stimulate in vitro myogenesis and in vivo muscle regeneration. *J. Physiol.* **595**, 5115-5127. doi:10.1113/JP273997
- Madaro, L., Passafaro, M., Sala, D., Etxaniz, U., Lugarini, F., Proietti, D., Alfonsi, M. V., Nicoletti, C., Gatto, S., De Bardi, M. et al. (2018). Denervation-activated STAT3-IL-6 signalling in fibro-adipogenic progenitors promotes myofibres atrophy and fibrosis. *Nat. Cell Biol.* **20**, 917-927. doi:10.1038/s41556-018-0151-y
- Malecova, B., Gatto, S., Etxaniz, U., Passafaro, M., Cortez, A., Nicoletti, C., Giordani, L., Torcinaro, A., De Bardi, M., Bicchato, S. et al. (2018). Dynamics of cellular states of fibro-adipogenic progenitors during myogenesis and muscular dystrophy. *Nat. Commun.* **9**, 3670. doi:10.1038/s41467-018-06068-6
- Mahmoudi, S., Mancini, E., Xu, L., Moore, A., Jahanbani, F., Hebestreit, K., Srinivasan, R., Li, X., Devarajan, K., Prélot, L. et al. (2019). Heterogeneity in old fibroblasts is linked to variability in reprogramming and wound healing. *Nature* **574**, 553-558. doi:10.1038/s41586-019-1658-5
- Mann, C. J., Perdiguero, E., Kharraz, Y., Aguilar, S., Pessina, P., Serrano, A. L. and Munoz-Canoves, P. (2011). Aberrant repair and fibrosis development in skeletal muscle. *Skelet Muscle* **1**, 21. doi:10.1186/2044-5040-1-21
- Massagué, J. (1998). TGF-beta signal transduction. *Annu. Rev. Biochem.* **67**, 753-791. doi:10.1146/annurev.biochem.67.1.753
- Massagué, J. (2012). TGFβ signalling in context. *Nat. Rev. Mol. Cell Biol.* **13**, 616-630. doi:10.1038/nrm3434
- Massagué, J., Cheifetz, S., Endo, T. and Nadal-Ginard, B. (1986). Type beta transforming growth factor is an inhibitor of myogenic differentiation. *Proc. Natl Acad. Sci. USA* **83**, 8206-8210. doi:10.1073/pnas.83.21.8206
- Mathew, S. J., Hansen, J. M., Merrell, A. J., Murphy, M. M., Lawson, J. A., Hutcheson, D. A., Hansen, M. S., Angus-Hill, M. and Kardon, G. (2011). Connective tissue fibroblasts and Tcf4 regulate myogenesis. *Development* **138**, 371-384. doi:10.1242/dev.057463
- Merrell, A. J., Ellis, B. J., Fox, Z. D., Lawson, J. A., Weiss, J. A. and Kardon, G. (2015). Muscle connective tissue controls development of the diaphragm and is a source of congenital diaphragmatic hernias. *Nat. Genet.* **47**, 496-504. doi:10.1038/ng.3250
- Minetti, G., Colussi, C., Adami, R., Serra, C., Mozzetta, C., Parente, V., Fortuni, S., Straino, S., Sampaolesi, M., Di Padova, M. et al. (2006). Functional and morphological recovery of dystrophic muscles in mice treated with deacetylase inhibitors. *Nat. Med.* **12**, 1147-1150. doi:10.1038/nm1479
- Mozzetta, C., Consalvi, S., Saccone, V., Tierney, M., Diamantini, A., Mitchell, K. J., Marazzi, G., Borsellino, G., Battistini, L., Sasso, D. et al. (2013). Fibroadipogenic progenitors mediate the ability of HDAC inhibitors to promote regeneration in dystrophic muscles of young, but not old Mdx mice. *EMBO Mol. Med.* **5**, 626-639. doi:10.1002/emmm.201202096
- Murphy, M. M., Lawson, J. A., Mathew, S. J., Hutcheson, D. A. and Kardon, G. (2011). Satellite cells, connective tissue fibroblasts and their interactions are crucial for muscle regeneration. *Development* **138**, 3625-3637. doi:10.1242/dev.064162
- Nakano, N., Itoh, S., Watanabe, Y., Maeyama, K., Itoh, F. and Kato, M. (2010). Requirement of TCF7L2 for TGF-β-dependent transcriptional activation of the TMEPA1 gene. *J. Biol. Chem.* **285**, 38023-38033. doi:10.1074/jbc.M110.132209
- Nalepa, G., Rolfe, M. and Harper, J. W. (2006). Drug discovery in the ubiquitin-proteasome system. *Nat. Rev. Drug Discov.* **5**, 596-613. doi:10.1038/nrd2056
- Nawshad, A., Medici, D., Liu, C.-C. and Hay, E. D. (2007). TGFβ3 inhibits E-cadherin gene expression in palate medial-edge epithelial cells through a Smad2-Smad4-LEF1 transcription complex. *J. Cell Sci.* **120**, 1646-1653. doi:10.1242/jcs.003129
- Nusse, R. and Clevers, H. (2017). Wnt/β-catenin signaling, disease, and emerging therapeutic modalities. *Cell* **169**, 985-999. doi:10.1016/j.cell.2017.05.016
- Oishi, T., Uezumi, A., Kanaji, A., Yamamoto, N., Yamaguchi, A., Yamada, H. and Tsuchida, K. (2013). Osteogenic differentiation capacity of human skeletal muscle-derived progenitor cells. *PLoS ONE* **8**, e56641. doi:10.1371/journal.pone.0056641
- Pessina, P., Kharraz, Y., Jardí, M., Fukada, S.-i., Serrano, A. L., Perdiguero, E. and Munoz-Canoves, P. (2015). Fibrogenic cell plasticity blunts tissue regeneration and aggravates muscular dystrophy. *Stem Cell Reports* **4**, 1046-1060. doi:10.1016/j.stemcr.2015.04.007
- Piersma, B., Bank, R. A. and Boersema, M. (2015). Signaling in fibrosis: TGF-β, WNT, and YAP/TAZ converge. *Front. Med.* **2**, 59. doi:10.3389/fmed.2015.00059
- Plikus, M. V., Guerrero-Juarez, C. F., Ito, M., Li, Y. R., Dedhia, P. H., Zheng, Y., Shao, M., Gay, D. L., Ramos, R., Hsi, T.-C. et al. (2017). Regeneration of fat cells from myofibroblasts during wound healing. *Science* **355**, 748-752. doi:10.1126/science.aai8792
- Ravindranath, A., O'Connell, A., Johnston, P. G. and El-Tanani, M. K. (2008). The role of LEF/TCF factors in neoplastic transformation. *Curr. Mol. Med.* **8**, 38-50. doi:10.2174/156652408783565559
- Reznikoff, C. A., Bertram, J. S., Brankow, D. W. and Heidelberger, C. (1973). Quantitative and qualitative studies of chemical transformation of cloned C3H mouse embryo cells sensitive to post-confluence inhibition of cell division. *Cancer Res.* **33**, 3239-3249.
- Rinkevich, Y., Walmsley, G. G., Hu, M. S., Maan, Z. N., Newman, A. M., Drukker, M., Januszky, M., Krampitz, G. W., Gurtner, G. C., Lorenz, H. P. et al. (2015). Identification and isolation of a dermal lineage with intrinsic fibrogenic potential. *Science* **348**, aaa2151. doi:10.1126/science.aaa2151
- Riquelme, C., Larrain, J., Schönherr, E., Henriquez, J. P., Kresse, H. and Brandan, E. (2001). Antisense inhibition of decorin expression in myoblasts decreases cell responsiveness to transforming growth factor α and accelerates skeletal muscle differentiation. *J. Biol. Chem.* **276**, 3589-3596. doi:10.1074/jbc.M004602200
- Riquelme-Guzmán, C. and Contreras, O. (2020). Single-cell revolution unveils the mysteries of the regenerative mammalian digit tip. *Dev. Biol.* **461**, 107-109. doi:10.1016/j.ydbio.2020.02.002
- Riquelme-Guzmán, C., Contreras, O. and Brandan, E. (2018). Expression of CTGF/CCN2 in response to LPA is stimulated by fibrotic extracellular matrix via the integrin/FAK axis. *Am. J. Physiol. Cell Physiol.* **314**, C415-C427. doi:10.1152/ajpcell.00013.2017
- Rognoni, E., Pisco, A. O., Hiratsuka, T., Sipilä, K. H., Belmonte, J. M., Mobasser, S. A., Philippeos, C., Dilão, R. and Watt, F. M. (2018). Fibroblast state switching orchestrates dermal maturation and wound healing. *Mol. Syst. Biol.* **14**, e8174. doi:10.15252/msb.201718174
- Saccone, V., Consalvi, S., Giordani, L., Mozzetta, C., Barozzi, I., Sandoná, M., Ryan, T., Rojas-Muñoz, A., Madaro, L., Fasanaro, P. et al. (2014). HDAC-regulated myomiRs control BAF60 variant exchange and direct the functional phenotype of fibro-adipogenic progenitors in dystrophic muscles. *Genes Dev.* **28**, 841-857. doi:10.1101/gad.234468.113
- Sambasivan, R., Yao, R., Kissenpennig, A., Van Wittenberghe, L., Paldi, A., Gayraud-Morel, B., Guenou, H., Malissen, B., Tajbakhsh, S. and Galy, A. (2011). Pax7-expressing satellite cells are indispensable for adult skeletal muscle regeneration. *Development* **138**, 3647-3656. doi:10.1242/dev.067587
- Schabot, E. J., Van Der Merwe, M., Loos, B., Moore, F. P. and Niesler, C. U. (2009). TGF-β's delay skeletal muscle progenitor cell differentiation in an isoform-independent manner. *Exp. Cell Res.* **315**, 373-384. doi:10.1016/j.yexcr.2008.10.037
- Schuijers, J., Mokry, M., Hatzis, P., Cuppen, E. and Clevers, H. (2014). Wnt-induced transcriptional activation is exclusively mediated by TCF/LEF. *EMBO J.* **33**, 146-156. doi:10.1002/embj.201385358
- Scott, R. W., Arostegui, M., Schweitzer, R., Rossi, F. M. V. and Underhill, T. M. (2019). Hic1 defines quiescent mesenchymal progenitor subpopulations with distinct functions and fates in skeletal muscle regeneration. *Cell Stem Cell* **25**, 797-813.e9. doi:10.1016/j.stem.2019.11.004
- Seo, H.-H., Lee, S., Lee, C. Y., Lee, J., Shin, S., Song, B.-W., Kim, I. K., Choi, J. W., Lim, S., Kim, S. W. et al. (2019). Multipoint targeting of TGF-β/Wnt transactivation circuit with microRNA 384-5p for cardiac fibrosis. *Cell Death Differ.* **26**, 1107-1123. doi:10.1038/s41418-018-0187-3
- Seto, E. and Yoshida, M. (2014). Erasers of histone acetylation: the histone deacetylase enzymes. *Cold Spring Harbor Perspect. Biol.* **6**, a018713. doi:10.1101/cshperspect.a018713
- Schafer, S., Viswanathan, S., Widjaja, A., Lim, W.-W., Moreno-Moral, A., Delaughter, D. M., Ng, B., Patone, G., Chow, K., Khin, E. et al. (2017). IL-11 is a crucial determinant of cardiovascular fibrosis. *Nature* **552**, 110-115. doi:10.1038/nature24676
- Shy, B. R., Wu, C. I., Khramtsova, G. F., Zhang, J. Y., Olopade, O. I., Goss, K. H. and Merrill, B. J. (2013). Regulation of Tcf711 DNA binding and protein stability as principal mechanisms of Wnt/β-catenin signaling. *Cell Reports* **4**, 1-9. doi:10.1016/j.celrep.2013.06.001
- Singh, R., Artaza, J. N., Taylor, W. E., Gonzalez-Cadavid, N. F. and Bhasin, S. (2003). Androgens stimulate myogenic differentiation and inhibit adipogenesis in C3H/10T1/2 pluripotent cells through an androgen receptor-mediated pathway. *Endocrinology* **144**, 5081-5088. doi:10.1210/en.2003-0741
- Smith, L. R. and Barton, E. R. (2018). Regulation of fibrosis in muscular dystrophy. *Matrix Biol.* **68-69**, 602-615. doi:10.1016/j.matbio.2018.01.014
- Soliman, H., Paylor, B., Scott, R. W., Lemos, D. R., Chang, C., Arostegui, M., Low, M., Lee, C., Fiore, D., Braghetta, P. et al. (2020). Pathogenic potential of Hic1-expressing cardiac stromal progenitors. *Cell Stem Cell* **26**, 205-220.e8. doi:10.1016/j.stem.2019.12.008
- Song, Y., Lee, S., Kim, J. R. and Jho, E.-H. (2018). Pja2 Inhibits Wnt/β-catenin Signaling by Reducing the Level of TCF/LEF1. *Int. J. Stem Cells* **11**, 242-247. doi:10.15283/ijsc18032
- Stark, C., Breitkreutz, B. J., Reguly, T., Boucher, L., Breitkreutz, A. and Tyers, M. (2006). BioGRID: a general repository for interaction datasets. *Nucleic Acids Res.* **34**, D535-D539.

- Surendran, K., Mccaull, S. P. and Simon, T. C. (2002). A role for Wnt-4 in renal fibrosis. *Am. J. Physiol. Renal. Physiol.* **282**, F431-F441. doi:10.1152/ajprenal.0009.2001
- Suzuki, K., Bose, P., Leong-Quong, R. Y., Fujita, D. J. and Riabowol, K. (2010). REAP: a two minute cell fractionation method. *BMC Research Notes* **3**, 294. doi:10.1186/1756-0500-3-294
- Tang, W., Dodge, M., Gundapaneni, D., Michnoff, C., Roth, M. and Lum, L. (2008). A genome-wide RNAi screen for Wnt/ $\beta$ -catenin pathway components identifies unexpected roles for TCF transcription factors in cancer. *Proc. Natl Acad. Sci. USA* **105**, 9697-9702. doi:10.1073/pnas.0804709105
- Tallquist, M. D. and Molkenin, J. D. (2017). Redefining the identity of cardiac fibroblasts. *Nat. Rev. Cardiol.* **14**, 484-491. doi:10.1038/nrcardio.2017.57
- The Tabula Muris Consortium, Overall coordination, Logistical coordination, Organ collection and processing, Library preparation and sequencing, Computational data analysis, Cell type annotation, Writing group, Supplemental text writing group and Principal investigators.** (2018). Single-cell transcriptomics of 20 mouse organs creates a Tabula Muris. *Nature* **562**, 367-372. doi:10.1038/s41586-018-0590-4
- Tian, X., Zhang, J., Tan, T. K., Lyons, J. G., Zhao, H., Niu, B., Lee, S. R., Tsatralis, T., Zhao, Y. and Wang, Y. et al. (2013). Association of  $\beta$ -catenin with P-Smad3 but not LEF-1 dissociates in vitro profibrotic from anti-inflammatory effects of TGF- $\beta$ 1. *J. Cell Sci.* **126**, 67-76. doi:10.1242/jcs.103036
- Tidball, J. G. and Vallalta, S. A. (2010). Regulatory interactions between muscle and the immune system during muscle regeneration. *Am. J. Physiol. Regul. Integr. Comp. Physiol.* **298**, R1173-R1187. doi:10.1152/ajpregu.00735.2009
- Trensz, F., Haroun, S., Cloutier, A., Richter, M. V. and Grenier, G. (2010). A muscle resident cell population promotes fibrosis in hindlimb skeletal muscles of mdx mice through the Wnt canonical pathway. *Am. J. Physiol. Cell Physiol.* **299**, C939-C947. doi:10.1152/ajpcell.00253.2010
- Uezumi, A., Fukada, S., Yamamoto, N., Ikemoto-Uezumi, M., Nakatani, M., Morita, M., Yamaguchi, A., Yamada, H., Nishino, I., Hamada, Y. et al. (2014a). Identification and characterization of PDGFR $\alpha$ + mesenchymal progenitors in human skeletal muscle. *Cell Death Dis.* **5**, e1186. doi:10.1038/cddis.2014.161
- Uezumi, A., Ikemoto-Uezumi, M. and Tsuchida, K. (2014b). Roles of nonmyogenic mesenchymal progenitors in pathogenesis and regeneration of skeletal muscle. *Front. Physiol.* **5**, 68. doi:10.3389/fphys.2014.00068
- Uezumi, A., Fukada, S., Yamamoto, N., Takeda, S. and Tsuchida, K. (2010). Mesenchymal progenitors distinct from satellite cells contribute to ectopic fat cell formation in skeletal muscle. *Nat. Cell Biol.* **12**, 143-152. doi:10.1038/ncb2014
- Uezumi, A., Ito, T., Morikawa, D., Shimizu, N., Yoneda, T., Segawa, M., Yamaguchi, M., Ogawa, R., Matev, M. M., Miyagoe-Suzuki, Y. et al. (2011). Fibrosis and adipogenesis originate from a common mesenchymal progenitor in skeletal muscle. *J. Cell Sci.* **124**, 3654-3664. doi:10.1242/jcs.086629
- Vallecillo-García, P., Orgeur, M., Vom Hofe-Schneider, S., Stumm, J., Kappert, V., Ibrahim, D. M., Borno, S. T., Hayashi, S., Relaix, F., Hildebrandt, K. et al. (2017). Odd skipped-related 1 identifies a population of embryonic fibro-adipogenic progenitors regulating myogenesis during limb development. *Nat. Commun.* **8**, 1218. doi:10.1038/s41467-017-01120-3
- Van De Wetering, M., Oosterwegel, M., Dooijes, D. and Clevers, H. C. (1991). Identification and cloning of TCF-1, a T cell-specific transcription factor containing a sequence-specific HMG box. *EMBO J.* **10**, 123-132. doi:10.1002/j.1460-2075.1991.tb07928.x
- Van De Wetering, M., Sancho, E., Verweij, C., De Lau, W., Oving, I., Hurlstone, A., Van Der Horn, K., Battle, E., Coudreuse, D., Haramis, A.-P. et al. (2002). The  $\beta$ -catenin/TCF4 complex imposes a crypt progenitor phenotype on colorectal cancer cells. *Cell* **111**, 241-250. doi:10.1016/S0092-8674(02)01014-0
- Vallée, A., Lecarpentier, Y., Guillevin, R. and Vallée, J.-N. (2017). Interactions between TGF- $\beta$ , canonical WNT/ $\beta$ -catenin pathway and PPAR $\gamma$  in radiation-induced fibrosis. *Oncotarget* **8**, 90579-90604. doi:10.18632/oncotarget.21234
- Vidal, B., Serrano, A. L., Tjwa, M., Suelves, M., Ardite, E., De Mori, R., Baeza-Raja, B., Martínez De Lagrán, M., Lafuste, P., Ruiz-Bonilla, V. et al. (2008). Fibrinogen drives dystrophic muscle fibrosis via a TGF $\beta$ /alternative macrophage activation pathway. *Genes Dev.* **22**, 1747-1752. doi:10.1101/gad.465908
- Wei, J., Melichian, D., Komura, K., Hinchcliff, M., Lam, A. P., Lafyatis, R., Gottardi, C. J., Macdougald, O. A., Varga, J. (2011). Canonical Wnt signaling induces skin fibrosis and subcutaneous lipotrophy: a novel mouse model for scleroderma? *Arthritis. Rheum.* **63**, 1707-1717. doi:10.1002/art.30312
- Weise, A., Bruser, K., Elfert, S., Wallmen, B., Wittel, Y., Wohrle, S. and Hecht, A. (2010). Alternative splicing of Tcf7l2 transcripts generates protein variants with differential promoter-binding and transcriptional activation properties at Wnt/ $\beta$ -catenin targets. *Nucleic Acids Res.* **38**, 1964-1981. doi:10.1093/nar/gkp1197
- Wosczyzna, M. N. and Rando, T. A. (2018). A muscle stem cell support group: coordinated cellular responses in muscle regeneration. *Dev. Cell* **46**, 135-143. doi:10.1016/j.devcel.2018.06.018
- Wosczyzna, M. N., Biswas, A. A., Cogswell, C. A. and Goldhamer, D. J. (2012). Multipotent progenitors resident in the skeletal muscle interstitium exhibit robust BMP-dependent osteogenic activity and mediate heterotopic ossification. *J. Bone Miner. Res.* **27**, 1004-1017. doi:10.1002/jbmr.1562
- Wosczyzna, M. N., Konishi, C. T., Perez Carbajal, E. E., Wang, T. T., Walsh, R. A., Gan, Q., Wagner, M. W. and Rando, T. A. (2019). Mesenchymal stromal cells are required for regeneration and homeostatic maintenance of skeletal muscle. *Cell Rep* **27**, 2029-2035.e5. doi:10.1016/j.celrep.2019.04.074
- Wynn, T. A. and Ramalingam, T. R. (2012). Mechanisms of fibrosis: therapeutic translation for fibrotic disease. *Nat. Med.* **18**, 1028-1040. doi:10.1038/nm.2807
- Xiang, F. L., Fang, M. and Yutzey, K. E. (2017). Loss of  $\beta$ -catenin in resident cardiac fibroblasts attenuates fibrosis induced by pressure overload in mice. *Nat. Commun.* **8**, 712. doi:10.1038/s41467-017-00840-w
- Yamada, M., Ohnishi, J., Ohkawara, B., Iemura, S., Satoh, K., Hyodo-Miura, J., Kawachi, K., Natsume, T. and Shibuya, H. (2006). NARF, a nemo-like kinase (NLK)-associated ring finger protein regulates the ubiquitylation and degradation of T cell factor/lymphoid enhancer factor (TCF/LEF). *J. Biol. Chem.* **281**, 20749-20760. doi:10.1074/jbc.M602089200
- Yamamoto, H., Ihara, M., Matsuura, Y. and Kikuchi, A. (2003). Sumoylation is involved in  $\beta$ -catenin-dependent activation of Tcf-4. *EMBO J.* **22**, 2047-2059. doi:10.1093/emboj/cdg204
- Yuan, T., Yan, F., Ying, M., Cao, J., He, Q., Zhu, H. and Yang, B. (2018). Inhibition of ubiquitin-specific proteases as a novel anticancer therapeutic strategy. *Front. Pharmacol.* **9**, 1080. doi:10.3389/fphar.2018.01080
- Zhang, Y. E. (2017). Non-smad signaling pathways of the TGF- $\beta$  family. *Cold Spring Harbor Perspect. Biol.* **9**, a022129. doi:10.1101/cshperspect.a022129
